1 Manuscript for a special issue in *Global and Planetary Change* on:

2 **Exploring the impact of Andean uplift and climate on life & landscape evolution: from Amazonia**  
3 **to Patagonia**, edited by Carina Hoorn, Luis Palazzesi, Daniele Silvestro

4

5 *Title*

6 **Mountain radiations are not only rapid and recent: Ancient diversification**  
7 **of South American frog and lizard families related to Paleogene Andean**  
8 **orogeny and Cenozoic climate variations**

9

10 *Authors*

11 Lydian M. Boschman<sup>a\*</sup>, Fabien L. Condamine<sup>b\*</sup>

12

13 *Affiliations*

14 <sup>a</sup>*Department of Environmental Systems Science, ETH Zurich, Universitätstrasse 16, 8092 Zurich,*  
15 *Switzerland;*

16 <sup>b</sup>*CNRS, UMR 5554 Institut des Sciences de l'Evolution de Montpellier (Université de Montpellier),*  
17 *Place Eugène Bataillon, 34095 Montpellier, France*

18

19 *Corresponding authors at:*

20 Department of Environmental Systems Science, ETH Zurich, Universitätstrasse 16, 8092 Zurich,  
21 Switzerland

22 E-mail address: [lydian.boschman@usys.ethz.ch](mailto:lydian.boschman@usys.ethz.ch) (L.M. Boschman).

23 CNRS, UMR 5554 Institut des Sciences de l'Evolution de Montpellier (Université de Montpellier),  
24 Place Eugène Bataillon, 34095 Montpellier, France

25 E-mail address: [fabien.condamine@gmail.com](mailto:fabien.condamine@gmail.com) (F.L. Condamine).

26

27 \* The authors contributed equally.

28

29

30

31

32

33

34

35

36

37 ***Abstract***

38 Mountainous areas host a disproportionately large fraction of Earth's biodiversity, suggesting a causal  
39 relationship between mountain building and biological diversification. Mountain clade radiations are  
40 generally associated with changes in environment, climate, and the increase in heterogeneity therein  
41 during mountain building. However, examining the causal relationship between mountain building and  
42 diversification is a complex challenge, because isolating the effects of surface uplift from other abiotic  
43 (climate) or biotic variables is not straightforward. In this study, we investigate the relative contributions  
44 of abiotic climate-driven (temperature) and geology-driven (elevation) drivers on evolutionary rates of  
45 ancient groups of organisms in the South American Andes. We present regional curves of Andean  
46 elevation based on a recent compilation of paleo-elevational data back to the Late Cretaceous, and  
47 analyse the diversification history of six Andean frog and lizard families that originated equally far back  
48 in time. For two clades (Aromobatidae and Leptodactylidae), we find that they diversified most rapidly  
49 during the early phase of mountain building (Late Cretaceous - Paleogene), when the first high-  
50 elevation habitats emerged in South America. The diversification of one clade (Centrolenidae) is  
51 correlated with Cenozoic temperature variations, with higher speciation rates during warm periods. The  
52 last three clades (Dendrobatidae, Hemiphractidae and Liolaemidae) are best explained by environment-  
53 independent diversification, although for Liolaemidae, an almost equally strong positive correlation  
54 was found between speciation and Andean elevation since the late Eocene. Our findings imply that  
55 throughout the long-lived history of surface uplift in the Andes, mountain building drove the  
56 diversification of different clades at different times, while not directly affecting other clades. Our study  
57 illustrates the importance of paleogeographic reconstructions that capture the complexity and  
58 heterogeneity of mountain building in our understanding of the effects that a changing environment  
59 plays in shaping biodiversity patterns observed today.

60

61 ***Keywords***

62 Andes, biodiversity, diversification, phylogenetics, Neotropics, uplift

63

64 ***Highlights***

- 65 • We provide novel regional paleoelevation curves for the Andes back to the Late Cretaceous
- 66 • The diversification history of six Andean-centered clades is studied
- 67 • We find clade-specific responses to environmental changes
- 68 • The impact of Andean uplift could reach further back in time than previously thought

69

70

71

72

73

## 74 **1. Introduction**

75 Mountainous areas cover approximately 25% of the surface of the continents, yet are home to 85% of  
76 the world's terrestrial amphibian, bird, and mammal species (Körner et al. 2016; Rahbek et al. 2019b).  
77 This strong imbalance in species richness suggests a causal relationship between mountain building and  
78 species radiations (Antonelli et al. 2018a; Hoorn et al. 2018; Rahbek et al. 2019a), and such radiations  
79 have been documented for various mountainous regions, across disparate groups of organisms (e.g.  
80 Drummond et al. 2012; Schwery et al. 2015; Favre et al. 2016; Lagomarsino et al. 2016; Ebersbach et  
81 al. 2017; Hutter et al. 2017; Xing and Ree 2017; Condamine et al. 2018; Esquerré et al. 2019; Muellner-  
82 Riehl et al. 2019; Ye et al. 2019; Ding et al. 2020). Mountain clade radiations are generally explained  
83 by landscape changes and the associated changes in climate and habitat connectivity, which lead to  
84 ecological opportunities and evolutionary innovations (Drummond et al. 2012; Hughes and Atchinson  
85 2015; Favre et al. 2016; Lagomarsino et al. 2016; Cortés et al. 2018). As a result, mountain clade  
86 radiations can be expected to be coeval with the timing of surface uplift. Although geological evidence  
87 for uplift histories of mountain ranges come with large uncertainties (Blisniuk and Stern 2005; Rowley  
88 and Garzzone 2007; Botsyun et al. 2020) and uplift is often spatially heterogeneous (e.g. Liu et al. 2016;  
89 Spicer et al. 2020; Boschman 2021), most of the present-day mountain habitats across the globe are  
90 thought to have formed gradually throughout the Cenozoic (e.g. Chamberlain et al. 1999, 2012;  
91 Nakajima et al. 2006; Fauquette et al. 2015; Liu et al. 2016; Boschman 2021). It is therefore surprising  
92 that documented mountain radiations are found to be generally recent (largely confined to the Pliocene  
93 and Pleistocene) and rapid (Linder 2008; Hughes and Atchinson 2015; Quintero and Jetz 2018).

94 The South American Andes, stretching over ~7,000 km from tropical Colombia to sub-polar  
95 Patagonia, are the most biodiverse mountains in the world, and the northern, Tropical Andes are  
96 considered the most species-rich of all biodiversity hotspots (Myers et al. 2000; Mittermeier et al. 2004).  
97 Including some of the most diverse radiations on Earth (Hughes and Eastwood 2006; Antonelli and  
98 Sanmartín 2011; Madriñan et al. 2013; Lagomarsino et al. 2016; Pérez-Escobar et al. 2017; Esquerré et  
99 al. 2019; Testo et al. 2019), this exceptional species richness is thought to be primarily the result of  
100 environmental heterogeneity along both the latitudinal and altitudinal gradients, resulting in a wide  
101 variety of climates, landscapes and vegetation types including dry forests and woodlands, tropical  
102 rainforests, cloud forests, and permanently or seasonally snow-covered grasslands (Squeo et al. 1993;  
103 Josse et al. 2011; Luebert and Weigend 2014; Cuesta et al. 2017). However, in addition, the  
104 paleoclimatic and paleogeographic history of the South American continent and of the Andes in  
105 particular is thought to have played a significant role (Gentry 1982; Antonelli and Sanmartín 2011).  
106 Since the break-up of the supercontinent Pangea and Late Cretaceous separation from Africa, South  
107 America remained an isolated “island-continent” (Simpson 1980) until the late Miocene formation of  
108 the Panama Isthmus (Montes et al. 2015; O’Dea et al. 2016), and shifted little in latitude. These ~90  
109 Myr of isolation and relative climatic stability may have favoured endemism and the gradual  
110 accumulation and preservation of lineages (Antonelli and Sanmartín 2011). Nonetheless, global-scale

111 climate fluctuations and mountain building led to significant variations in environment (Armijo et al.  
112 2015), affecting the evolution of life. For example, plant diversity has been shown to be positively  
113 correlated with Cenozoic temperature, whereby diversity levels during the warm Eocene likely  
114 exceeded the Holocene and present (Wilf et al. 2003; Jaramillo et al. 2006). Andean mountain building  
115 affected diversity in multiple ways: locally, mountain building is thought to have increased diversity  
116 through isolation and allopatric speciation (Hazzi et al. 2018) and ecological adaptation to altitude  
117 (Nevado et al. 2018). Regionally, the Andes are often considered to have acted as a “species pump”,  
118 producing lineages that colonized the surrounding Neotropical lowlands (e.g. Santos et al. 2009;  
119 Luebert and Weigend 2014; Chazot et al. 2019). Moreover, the environmentally diverse slopes of the  
120 Andes have repeatedly attracted non-Andean lineages, acting as a “species attractor”, increasing species  
121 richness through colonization (e.g. Drummond et al. 2012; Chazot et al. 2016; Hutter et al. 2017;  
122 Toussaint et al. 2019). These mechanisms are not mutually exclusive because for some clades, a mixture  
123 of both processes (colonization in and out of the Andes) has been reported, increasing diversity in both  
124 the mountains and the surrounding lowlands (Brumfield and Edwards 2007; Pérez-Escobar et al. 2017;  
125 Antonelli et al. 2018b).

126         The many recent (Neogene) documented mountain radiations in and around the Andes are  
127 commonly explained in light of recent uplift (Hughes and Eastwood 2006; Hoorn et al. 2010; Antonelli  
128 and Sanmartín 2011; Madriñan et al. 2013; Luebert and Weigend 2014; Lagomarsino et al. 2016; Pérez-  
129 Escobar et al. 2017; Esquerré et al. 2019; Testo et al. 2019). This recent uplift is inferred from studies  
130 presenting stable isotope paleoaltimetry and fossil leaf physiognomy data from the Eastern Cordillera  
131 of Colombia and the eastern Altiplano/Eastern Cordillera of the central Andes, concluding that rapid  
132 uplift occurred in the last ~12 million years (Gregory-Wodzicki 1998, 2000; Garzzone et al. 2008).  
133 However, the sedimentary records from the Andean foreland basins indicate that uplift in the Andes  
134 initiated already in the Late Cretaceous: ~100 million years ago (Ma) in Patagonia, and ~70 Ma in the  
135 central and northern Andes (Horton 2018). Moreover, since the studies of Gregory-Wodzicki (1998;  
136 2000) and Garzzone et al. (2008), a wealth of paleoaltimetry datasets has been published, depicting a  
137 much more complex picture (e.g. Bershaw et al. 2010; Leier et al. 2013; Canavan et al. 2014; Carrapa  
138 et al. 2014; Garzzone et al. 2014; Hoke et al. 2014; Saylor and Horton 2014; Quade et al. 2015; Anderson  
139 et al. 2015, 2016; Fiorella et al. 2015; Kar et al. 2016; Rohrmann et al. 2016; Colwyn et al. 2019). This  
140 body of work, compiled and summarized in Boschman (2021), shows that (i) topography was already  
141 in place in Patagonia and in the western ranges along the Pacific coast during the Late Cretaceous and  
142 Paleogene, (ii) most of the central and eastern ranges were uplifted during the last 50 to 30 Myr, and  
143 (iii) uplift migrated further eastwards towards the Subandean zone in the last 10 Myr (**Fig. 1**).  
144 Nonetheless, the idea that the bulk of the topography in the Andes has emerged very recently has  
145 persisted in biogeographic and macroevolutionary literature (e.g. Hughes and Eastwood 2006;  
146 Lagomarsino et al. 2016; Pérez-Escobar et al. 2017; Hazzi et al. 2018).

147           Examining the causal relationship between mountain building and diversification is a complex  
148 challenge, because isolating the effects of surface uplift throughout the Cenozoic from other abiotic  
149 (climate) or biotic variables is not straightforward (Marx and Uhen 2010; Ezard et al. 2011, 2016;  
150 Condamine et al. 2019a,b). Moreover, these abiotic and biotic variables are not independent, as  
151 mountain building affects both local and regional climate and biotic mechanisms and interactions,  
152 which, in turn, have their effects on diversification (Hoorn et al. 2010; Favre et al. 2015; Antonelli et  
153 al. 2018; Ding et al. 2020). Because of this synergy of factors that can affect diversification, there is  
154 debate over whether mountain uplift was the primary factor in promoting diversification or that instead,  
155 climate change may have played a crucial role (Drummond et al. 2012; Hoorn et al. 2013; Mutke et al.  
156 2014; Hughes and Atchison 2015; Hutter et al. 2017; Nevado et al. 2018). An important step towards  
157 answering such questions is the quantitative correlation between diversification rates and environmental  
158 variables. Four studies so far, focussing on radiations of young (Neogene) clades, have attempted this,  
159 and found positive correlations between speciation rates and the paleoelevation of the Andes, suggesting  
160 a causal link between surface uplift and diversification of the studied clades (Lagomarsino et al. 2016;  
161 Pérez-Escobar et al. 2017; Esquerré et al. 2019; Testo et al. 2019). However, these studies have applied  
162 elevation-dependent diversification models, without comparing, in a common statistical framework,  
163 other diversification models considering the effect of time alone, or of other environmental variables  
164 (e.g. temperature). In this study, we embrace the challenge to study the relative contributions of climate-  
165 driven abiotic and geology-driven abiotic drivers on evolutionary rates of ancient groups of organisms.  
166 We aim at teasing apart the contribution of Andean mountain building, for which we use a novel  
167 reconstruction that includes surface uplift since the Late Cretaceous, global climate change, and time,  
168 on the diversification of Neotropical frog and lizard groups mostly distributed in the Andes. This study  
169 provides the next step towards an understanding of why some lineages diversify extensively during  
170 uplift while others do not, and consequently, of our understanding of modern biodiversity patterns  
171 including the relationship between topography and species richness.

172

## 173 **2. Materials and methods**

### 174 *2.1. Selection of biological groups occurring in the Andes*

175 We focus in this study on amphibians and squamates that are particularly well diversified in the Andes  
176 (Myers et al. 2000; Mittermeier et al. 2004). We compiled a dataset of species-level time-calibrated  
177 phylogenies from the literature, including family-level phylogenies with a rich species diversity that  
178 sampled at least 65% of the total species diversity (i.e. sampling fraction of 0.65: ratio of sampled  
179 species over known species). For amphibians, we relied on a phylogeny of 2,318 hyloid frog species  
180 (Hutter et al. 2017), which was constructed with a supermatrix analysis of molecular data. There are  
181 2,488 known species of Hyloidea in South America, and 1,594 were sampled in the tree (64%). From  
182 this tree, we selected the five best sampled frog families with an average sampling fraction of 0.793  
183 (654 sampled species over 825 known species) and with an average age of origin of 65.4 Ma (**Table 1**).

184 For squamates, we only selected the lizard family Liolaemidae, which is one of the richest vertebrate  
185 Andean radiation with over 320 species (258 sampled), originating around 37 Ma (**Table 1**). The  
186 species-level time-calibrated phylogeny was retrieved from the study of Esquerré et al. (2019). Four of  
187 the six selected clades originated during the Late Cretaceous; two are younger and originated during  
188 the late Eocene (Liolaemidae) or at the Eocene-Oligocene boundary (Centrolenidae).

189 The six selected clades are widespread in either the whole (Leptodactylidae), central and  
190 southern (Liolaemidae), or northern and north-central Andes (the other four; **Supplementary**  
191 **materials**). However, except for Liolaemidae, they are not confined to the Andean ranges alone, and  
192 for Aromobatidae and Leptodactylidae, the main center of species diversity is in fact outside of the  
193 Andes: in Amazonia and the Guiana Shield region, and in the Atlantic Forest, respectively. Species of  
194 the genus *Adenomera* are for example most widely distributed throughout the lowlands of tropical South  
195 America east of the Andes (Fouquet et al. 2014). Nonetheless, the origin and geographic range evolution  
196 of Aromobatidae and Leptodactylidae are thought to be intimately linked to the Andes (Santos et al.  
197 2009; Hutter et al. 2017), and most species in these clades Aromobatidae and Leptodactylidae are  
198 associated with montane environments and are leaf-litter dwelling, which favors allopatry (Fouquet et  
199 al. 2013; Santos et al. 2020).

200

201 **Table 1.** Summary of diversity, distribution, and ages of hyloid frog and lizard clades used to estimate  
202 the diversification rates. The frog data are from the study of Hutter et al. (2017) with updates from the  
203 AmphibiaWeb (<http://amphibiaweb.org/>), while the lizard data are from the study of Esquerré et al.  
204 (2019) with updates from the Reptile Database (<http://www.reptile-database.org/>).

205

| Clade         | Age of origin (Ma) | Number of genera | Species diversity (sampled) | Sampling fraction | Elevational range (m) | Distribution range                                    |
|---------------|--------------------|------------------|-----------------------------|-------------------|-----------------------|-------------------------------------------------------|
| Aromobatidae  | 67.18              | 5                | 127 (118)                   | 0.929             | 500 (0-3300)          | Northern and central Andes, Amazonia, Atlantic Forest |
| Centrolenidae | 33.4               | 12               | 160 (128)                   | 0.8               | 1400 (0-3501)         | Northern and central Andes, Amazonia, Atlantic Forest |
| Dendrobatidae | 67.35              | 16               | 197 (136)                   | 0.69              | 840 (0-3799)          | Northern and central Andes, Amazonia                  |

|                 |       |    |           |       |                    |                                                   |
|-----------------|-------|----|-----------|-------|--------------------|---------------------------------------------------|
| Hemiphractidae  | 80.69 | 6  | 118 (86)  | 0.729 | 1640 (0-4600)      | Northern and central<br>Andes, Atlantic<br>Forest |
| Leptodactylidae | 78.07 | 14 | 223 (186) | 0.834 | 500 (0-4480)       | whole South America                               |
| Liolaemidae     | 36.9  | 3  | 321 (258) | 0.804 | 2150 (20-<br>5000) | Central and southern<br>Andes                     |

---

206

## 207 2.2. Reconstruction of Andean uplift

208 We used the reconstruction of paleoelevation in the Andes since 80 Ma of Boschman (2021), which is  
209 based on a wide variety of input data, including stable isotope paleoaltimetry, stratigraphy,  
210 thermochronology, paleosurfaces, paleobotany, paleontology, palynology and fossil leaf physiognomy.  
211 This reconstruction is presented as a series of raster files, one per million-year time step, in 0.1 degree  
212 resolution. It thereby provides a very detailed overview of the history of Andean mountain building,  
213 including the stark contrast in timing and magnitude of uplift between the different domains of the  
214 Andes. To convert this reconstruction (**Fig. 1C**) into a quantitative time series that we can use in the  
215 birth-death modelling, we first condensed it into uplift curves (in m.a.s.l. through geological time) for  
216 seven individual geomorphological domains (**Fig. 1A, B**) for which we describe the history of uplift  
217 below. Second, we computed curves of elevation through time for each of the selected clades, whereby  
218 we included the elevational history of the Andean ranges that fall within the distribution ranges of the  
219 clades (**Supplementary materials**), resulting in curves for (1) the northern and north-central Andes  
220 (domains 1-3 of Fig. 1) for Aromobatidae, Centrolenidae, Dendrobatidae and Hemiphractidae, (2) the  
221 central and southern Andes (domains 4-7 of Fig. 1) for Liolaemidae, and (3) the whole Andes (all 7  
222 domains) for Leptodactylidae (**Fig. 2**).

223 In the southern (Patagonian) Andes (**Fig. 1**, domain 7), uplift initiated the earliest, at around  
224 100 Ma (Dalziel et al. 1974; Bruhn and Dalziel, 1977, Kohn et al. 1995, Fosdick et al. 2011; Horton  
225 2018), and modern elevations were reached at around 55 Ma (Colwyn et al. 2019). During the Miocene,  
226 the southern part of the orogen experienced additional uplift, primarily through expanding its width  
227 (Davis et al. 1983; Blisniuk et al. 2005, 2006; Giambiali et al. 2016). In the central Andes, including  
228 the world's second largest and highest plateau area (the Altiplano-Puna Plateau), significant uplift  
229 initiated along the western margin of the South American plate at around 70 Ma (Horton 2018). Since  
230 then, uplift has migrated eastward, with major phases of uplift in the late Paleocene-Eocene at the  
231 western margin of the plateau area (**Fig. 1**, domain 4), in the Miocene at the eastern margin of the  
232 plateau area (domain 5), and active uplift since the middle Miocene in the easternmost Subandean zone  
233 (domain 6)(Carrapa et al. 2006, 2014; Scheuber et al. 2006; Uba et al. 2006; Leier et al. 2013; Canavan

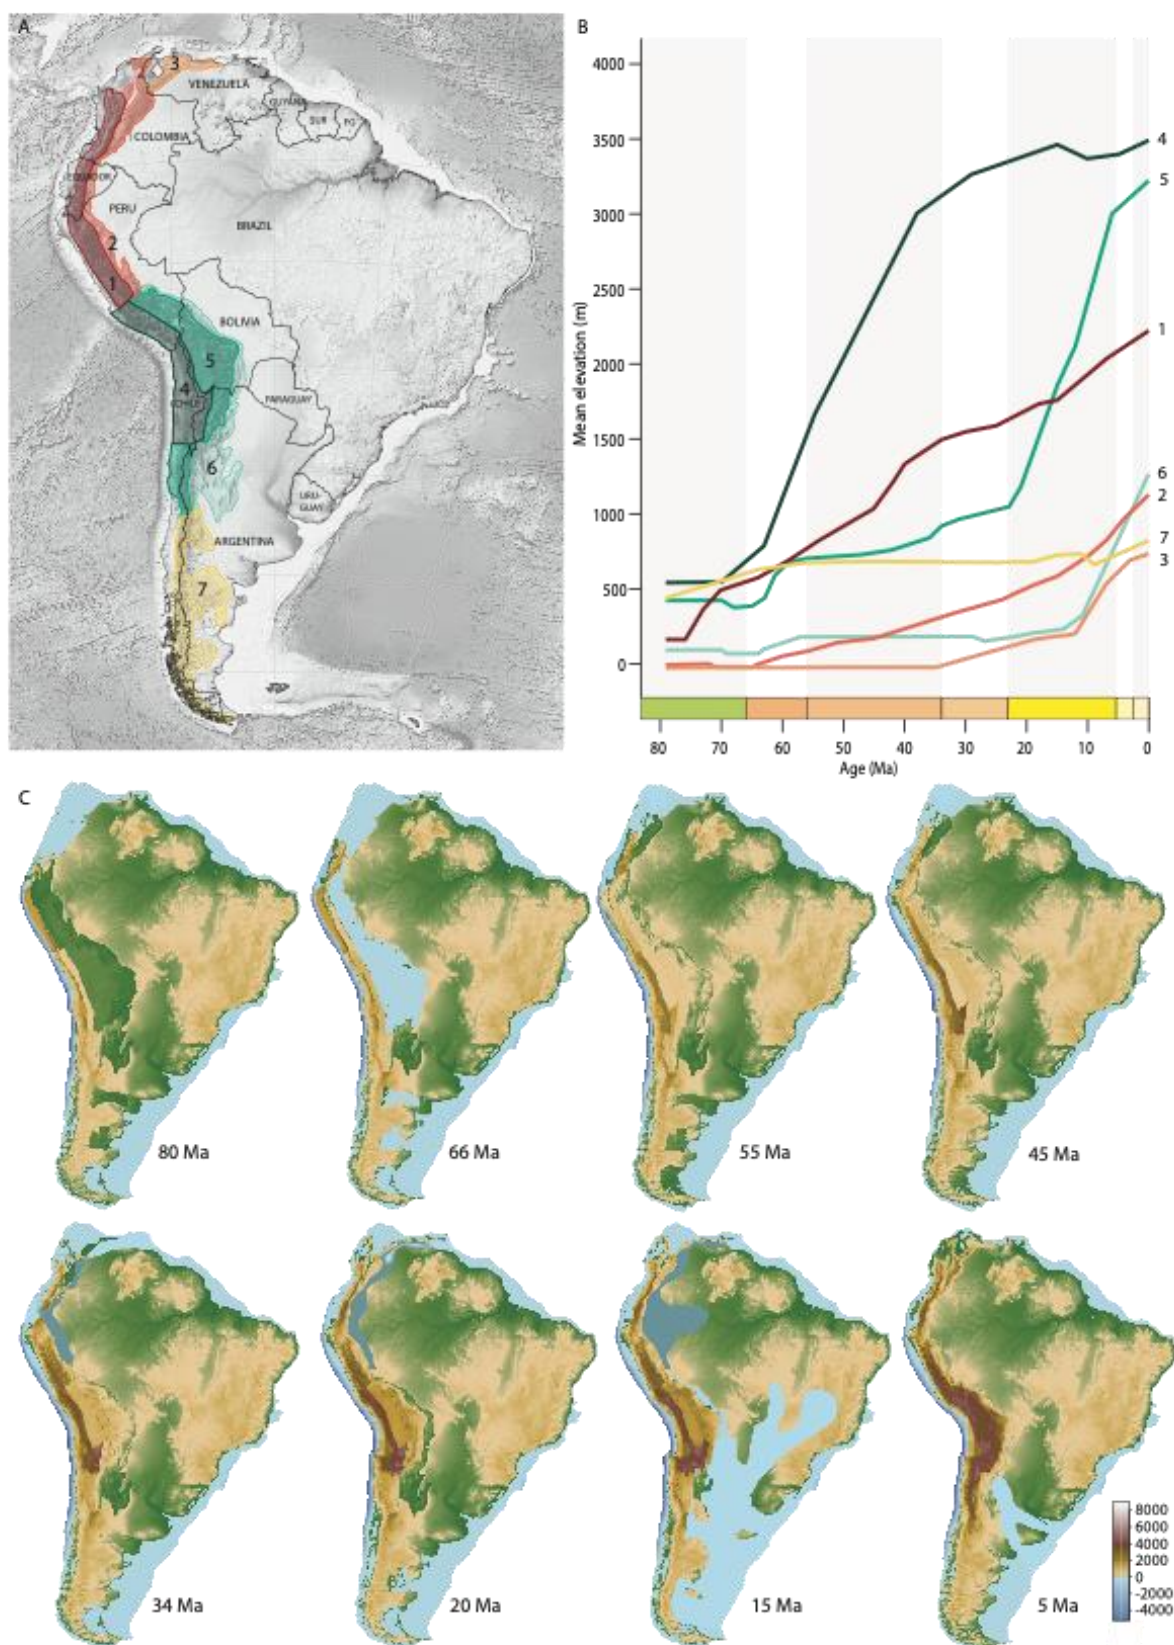

234

235 **Figure 1.** A) Map of South America; digital elevation model in black and white from Etopo1 (Amante  
236 and Eakins 2009). The Andes are divided into seven geomorphological domains, based on uplift history.

237 B) Paleoelevation history of the seven domains since 80 Ma, showing the spatial and temporal



238 heterogeneity of the uplift. Negative average elevations (of northern Andean domains) represent  
239 elevations below sea level. C) Maps of Andean mountain building. The maps include marine incursions  
240 (in light blue) and lakes and wetlands (in grey-blue) based on Hoorn and Wesselingh (2001) for  
241 Amazonia and Hernández et al. (2005) for southeastern South America. Topography of the eastern part  
242 of the continent is not reconstructed (modern topography is shown) and the maps do therefore not  
243 include much less well-documented changes in topography in the Guiana and Brazilian shields areas,  
244 or other paleogeographic features. Paleoelevation curves and maps are based on Boschman (2021).

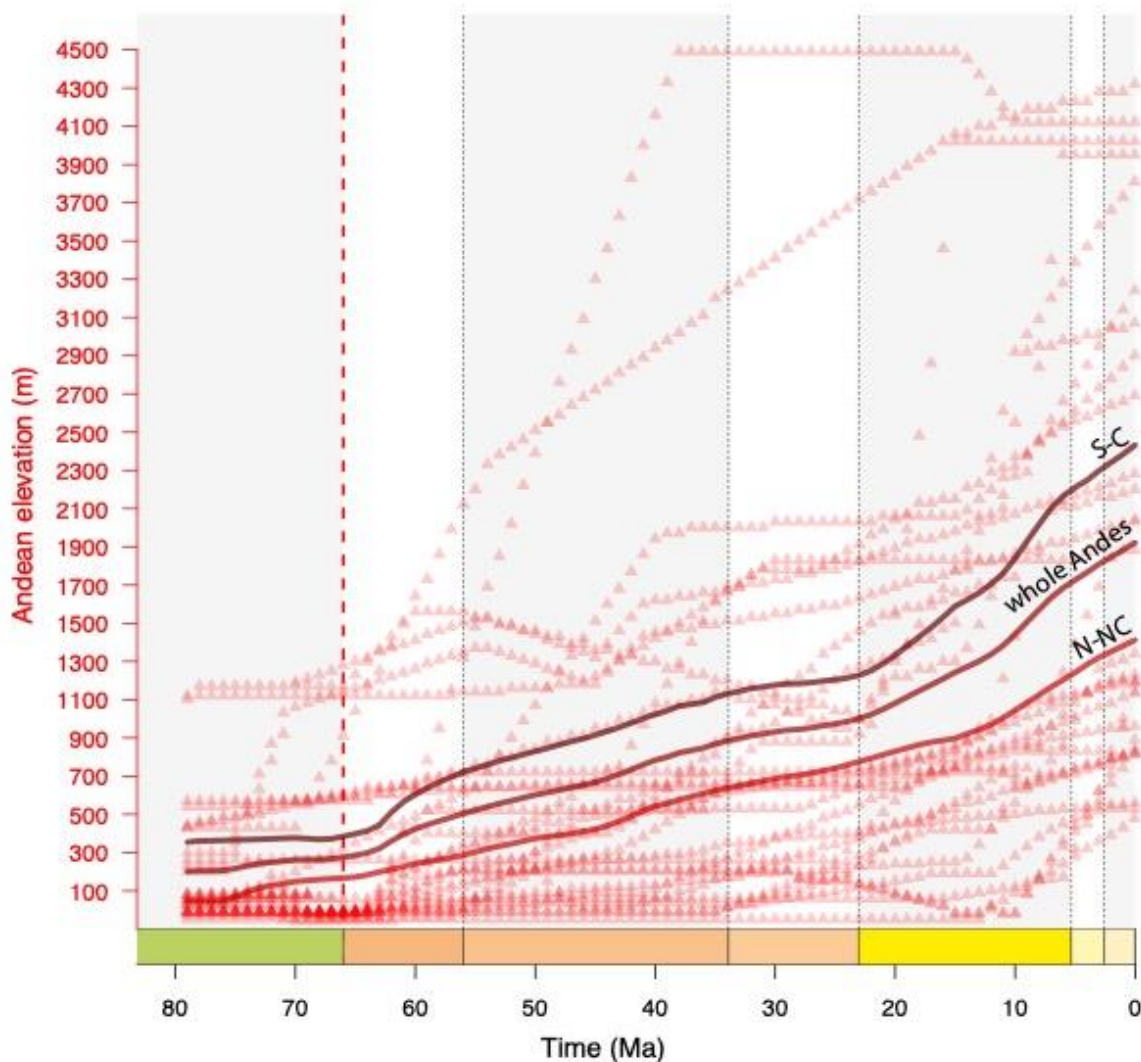

245  
246 **Figure 2.** The Andean elevation curves used to estimate Neotropical diversification over the last 80  
247 Myr. Red triangles represent data from individual geomorphological domains as reconstructed by  
248 Boschman (2021); solid lines represent the smoothed curves that are used as input in the elevation-  
249 dependent birth-death models (see descriptions in 2.4 and 2.5). S-C: southern and central Andes  
250 (domains 4-7 of Fig. 1), paleoelevation curve for Liolaemidae; N-NC: northern and north-central Andes  
251 (domains 1-3 or Fig. 1), paleoelevation curve for Aromobatidae, Centrolenidae, Dendrobatidae and  
252 Hemiphractidae; whole Andes (all 7 domains of Fig. 1) curve for Leptodactylidae.

253 et al. 2014; Garzzone et al. 2014; Fiorella et al. 2015; Quade et al, 2015; Rohrman et al. 2016). Mountain  
254 building in the northern Andes resulted from ~70 Ma collision of the leading edge of the Caribbean  
255 Plate with the South American continental margin at the latitude of what is today Ecuador, and occurred  
256 initially only at the location of collision (Montes et al. 2019). Most of the northwestern corner of the  
257 South American continent remained below sea level throughout the Late Cretaceous and early  
258 Paleogene (Sarmiento-Rojas 2019). During the Paleogene, uplift slowly migrated to the north and east,  
259 reaching the Central Cordillera (part of domain 1) in the Eocene and the Perija Range and Santander  
260 Massif in the latest Eocene-Oligocene (part of domain 2). During the early Miocene, the Eastern  
261 Cordillera, Garzon Massif (part of domain 2) and Merida Andes (domain 3) experienced pronounced  
262 uplift, and uplift in these latter eastern ranges intensified since the Miocene (Gómez et al. 2005a,b;  
263 Villagómez et al. 2011; Anderson et al. 2015, 2016; Bermúdez et al. 2017; Horton 2018).

264

### 265 *2.3. Temperature data*

266 To capture the major trends in global climate through time throughout the clades' evolutionary histories,  
267 we computed a temperature curve based on  $\delta^{18}\text{O}$  data measured from deep-sea benthic foraminifera  
268 shells preserved in oceanic sediments (**Fig. 3**). For the Cenozoic, we used the dataset from Westerhold  
269 et al. (2020; available at: <https://doi.org/10.1594/PANGAEA.917717>), and for the Cretaceous (80-66  
270 Ma), the dataset from Veizer and Prokoph (2015; available at:  
271 <https://doi.org/10.1016/j.earscirev.2015.03.008>). To convert  $\delta^{18}\text{O}$  measurements to temperature values,  
272 we used the equations of Hansen et al. (2013), which convert  $\delta^{18}\text{O}$  to deep-ocean temperatures ( $T_{\infty}$ ) and  
273 subsequently, to surface temperatures ( $T_s$ ); these equations are provided in the supplementary materials  
274 1. We then summarized these data into a continuous estimate of temperature through time through  
275 calculation of a smoothing spline (degrees of freedom: 80). While each individual data point is subject  
276 to certain biases (e.g. some of them do not account for sea-level fluctuations, which are important during  
277 periods of large-scale glaciations, Cramer et al. 2011), the spline curve smoothens such biases, as well  
278 as geographical variations, providing a reliable estimate of global temperature trends (Veizer and  
279 Prokoph 2015). The surface temperature curve reflects planetary-scale climatic trends that can be  
280 expected to have led to temporally coordinated diversification changes in several clades rather than  
281 local or seasonal fluctuations (Erwin 2009; Hannisdal and Peters 2011; Mayhew et al. 2012; Condamine  
282 et al. 2019a).

283

### 284 *2.4. Modelling the effects of environmental change on diversification*

285 Many studies have shown that the environment, shaped by long-term climate change and plate tectonics,  
286 plays a prominent role in the diversification of species over evolutionary and geological time scales  
287 (e.g. Mayhew et al. 2012; Zaffos et al. 2017). Yet, these studies have mostly based their conclusions on  
288 descriptive comparisons between dated speciation or extinction events estimated from fossil or

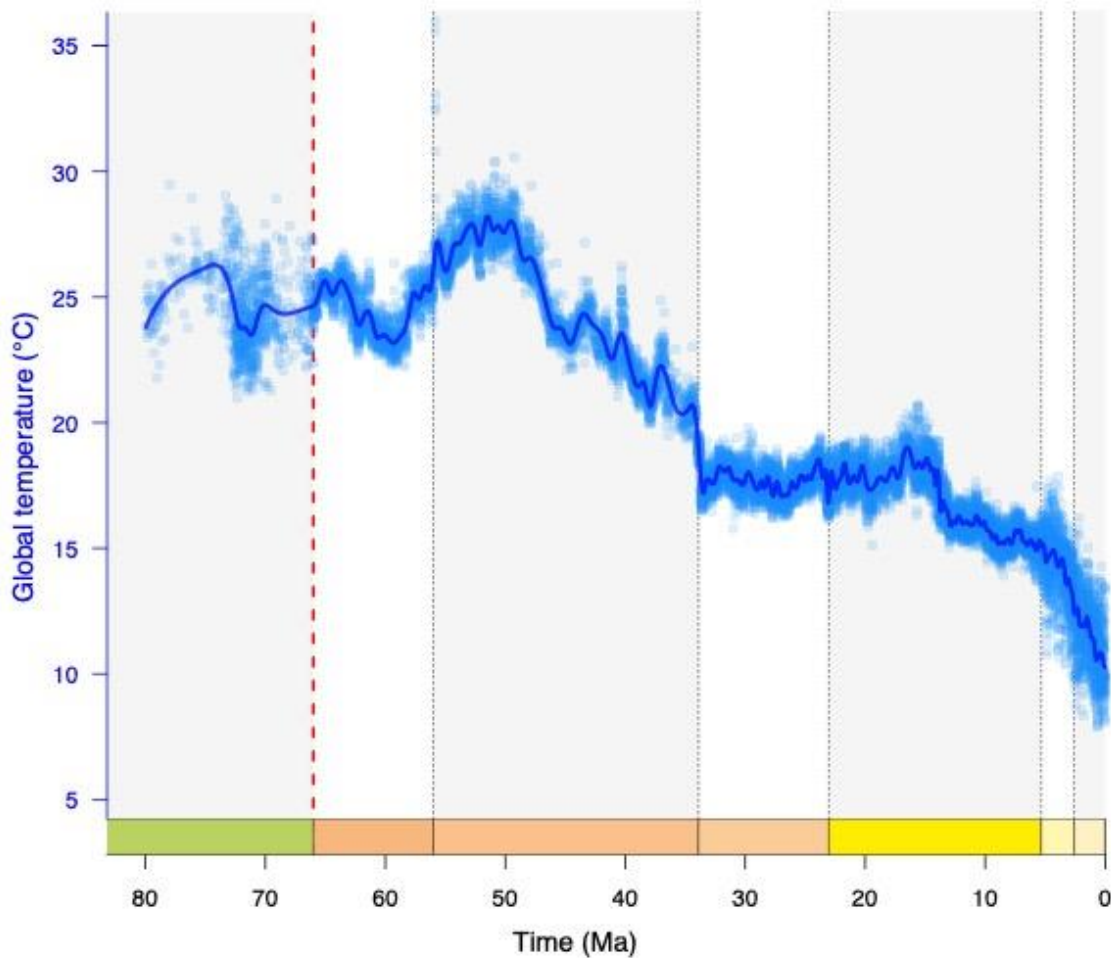

289

290 **Figure 3.** The global temperature curve used to estimate Neotropical diversification over the last 80  
291 Myr. The trend of temperature is based on oxygen isotope ratios in benthic foraminifera shells; data  
292 from Veizer and Prokoph (2015) for the Late Cretaceous, and Westerhold et al. (2020) for the Cenozoic.  
293 Isotope ratios are converted to surface temperatures using the equations from Hansen et al. (2013). Blue  
294 circles represent data from individual  $\delta^{18}\text{O}$  measurements; the solid line represents the smoothed curve  
295 that is used as input in the temperature-dependent birth-death models (see descriptions in 2.4 and 2.5).

296

297 phylogenetic data and paleoenvironmental curves (e.g. Delsuc et al. 2004; Antonelli et al. 2009; Eronen  
298 et al. 2015; Fan et al. 2020). Such an approach is suitable for events that occurred “instantaneously” in  
299 the context of geological time (i.e. within a million year), such as mass extinctions, but may not always  
300 be appropriate when comparing slower environmental changes. Most climate “events”, such as the  
301 Eocene Climatic Optimum (~56-46 Ma), the middle Miocene climatic optimum (~17-15 Ma) or the  
302 overall Cenozoic cooling trend, take place over longer timescales (Veizer and Prokoph 2015;  
303 Westerhold et al. 2020), and so do environmental changes related to plate tectonics such as the uplift of  
304 the Andes, which took place over the last ~100 Myr (Boschman 2021). Furthermore, geological events

305 are often intrinsically related to climate change, which complicates linking isolated environmental  
306 changes to single diversification events. For example, the uplift of the Andes affected climate in the  
307 eastern Pacific Ocean and above the South American continent (Sepulchre et al. 2010; Armijo et al.  
308 2015), and uplift of the Qinghai-Tibetan Plateau shaped the Asian monsoon system (Molnar et al. 1993;  
309 An et al. 2011; Favre et al. 2015). In addition, the aforementioned descriptive approaches generally use  
310 phylogenetic trees — branching trees that represent the evolutionary relationships among species —  
311 that have uncertainties in their configuration and in age estimates of the speciation events, which makes  
312 comparison between a given environmental variable and the diversification processes ambiguous.  
313 Finally, these approaches do not quantify the long-term effect of environmental factors in shaping  
314 diversification rates, but rather look for punctuated change in diversification.

315 To account for these issues, methods have been developed in recent years to quantitatively  
316 explore factors that are potentially linked to speciation and/or extinction of lineages throughout  
317 geological and evolutionary time, thereby providing new opportunities to address questions about the  
318 mechanisms that shape diversity patterns (Egan et al. 2008; Condamine et al. 2013; Davis et al. 2016).  
319 Such methods have been made possible by the increased availability of statistical tools to analyse  
320 molecular and fossil data, and accessibility of time-calibrated molecular phylogenies. We focus in this  
321 study on phylogeny-based approaches, but note that these are beginning to converge with fossil-based  
322 approaches in their conceptual development and inferences to estimate temporal variations of  
323 diversification rates (Morlon et al. 2011; Silvestro et al. 2014, 2019), and evolutionary response to  
324 variations of the environment (Condamine et al. 2013; Silvestro et al. 2015; Lehtonen et al. 2017).

325 The approach used in this study, developed by Condamine et al. (2013, 2019a) and hereafter  
326 termed the environment-dependent diversification model, builds on time-dependent diversification  
327 models (Nee et al. 1994; Morlon et al. 2011), but allows speciation and extinction rates to depend not  
328 only on time but also on an external variable (which may vary through time). This methodology is  
329 implemented in the R-package *RPANDA* (Morlon et al. 2016). Clades are assumed to evolve under a  
330 birth-death process, in which both speciation and extinction follow a Poisson process, meaning that the  
331 expected waiting time to an event follows an exponential distribution (Nee 2006). As a result, we  
332 assume the speciation and extinction functions to be exponential. Speciation ( $\lambda$ ) and extinction ( $\mu$ ) rates  
333 can vary through time, and both can be influenced by one or several environmental variables (here:  
334 temperature ( $T$ ), and Andean elevation ( $A$ )) that also vary through time. We consider the phylogeny of  
335  $n$  species sampled from the present, and allow for the possibility that some extant species are not  
336 included in the sample by assuming that each extant species was sampled with probability  $f \leq 1$ . Time  
337 is measured from the present to the past such that it denotes branching times in the phylogeny.

338

### 339 *2.5. Analyzing the diversification of Andean clades*

340 In this study, we fitted 14 diversification models to each of the six selected phylogenies using maximum  
341 likelihood (Stadler 2013; Morlon 2014). We consider four types of models with diversification rates

342 that are constant (2 models), time-varying (4 models), temperature-dependent (4 models), and  
 343 elevation-dependent (4 models) (**Fig. 4A; Table 2**). These models are fitted by maximum likelihood  
 344 using the *fit\_bd* (for the time-constant and time-varying models) and *fit\_env* functions (for the  
 345 temperature- and elevation-dependent models) from the R-package RPANDA 1.9 (Morlon *et al.* 2016).  
 346 We accounted for missing species by specifying the sampling fraction corresponding to each phylogeny.  
 347 We used the “crown” condition, which conditions the likelihood of a speciation event at the crown age  
 348 and survival of the two daughter lineages.

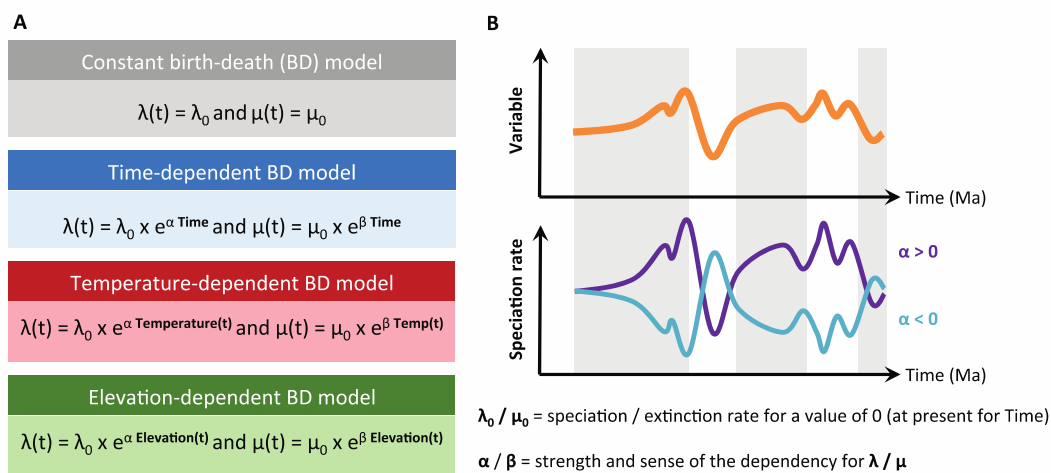

349  
 350 **Figure 4.** Schematic description of the birth-death (BD) models used to estimate diversification rates.  
 351 A) List of the four types of BD models with corresponding rate functions for speciation and extinction.  
 352 B) Example of speciation rate through time  $\lambda(t)$  obtained from the relationship between speciation rate  
 353 and the past variation of an environmental variable (orange curve). The relationship between speciation  
 354 rate and environment can be positive ( $\alpha > 0$ ; purple curve) or negative ( $\alpha < 0$ ; light blue curve). If  $\alpha =$   
 355 0 there is no effect of the environment, and the speciation rate is constant.

356  
 357 In the time-dependent models,  $\lambda$  or both  $\lambda$  and  $\mu$  vary as a continuous function of time (**Table 2**):  
 358  $\lambda(t) = \lambda_0 e^{\alpha t}$  or  $\mu(t) = \mu_0 e^{\beta t}$ , where  $\lambda_0$  ( $\mu_0$ ) is the speciation (extinction) rate at present. A positive  $\alpha$  ( $\beta$ ) reflects  
 359 a slowdown of speciation (extinction) towards the present, while a negative  $\alpha$  ( $\beta$ ) reflects a speed-up of  
 360 speciation (extinction) towards the present, and the sign and value of  $\alpha$  and  $\beta$  depends on the data and  
 361 model optimization. In the environment-dependent models, speciation rates, extinction rates, or both  
 362 vary as a continuous function of Andean elevation  $A$  (**Fig. 2**) or temperature  $T$  (**Fig. 3**), for which the  
 363 curves are computed using a spline interpolation which the degree of freedom set to 80 (df=80 in the  
 364 *fit\_env* function). We consider the same exponential dependency as above, but with  $t$  replaced by  $T(t)$   
 365 or  $A(t)$ . In this case  $\lambda_0$  ( $\mu_0$ ) is the expected speciation (extinction) rate under a temperature of 0°C or an  
 366 altitude of 0 meter, and  $\alpha$  ( $\beta$ ) measures the sign and strength of the temperature or paleoelevation  
 367 dependence (**Fig. 4B**). A positive  $\alpha$  ( $\beta$ ) indicates that speciation (extinction) rates are

| Type of model                | Model description                           | Model equation                                                         | Number of parameters | Model acronym in Table 3 |
|------------------------------|---------------------------------------------|------------------------------------------------------------------------|----------------------|--------------------------|
| Constant-rate models         | Constant speciation and no extinction       | $\lambda(t)=\lambda_0$ and $\mu(t)=0$                                  | 1                    | BCST                     |
|                              | Constant speciation and constant extinction | $\lambda(t)=\lambda_0$ and $\mu(t)=\mu_0$                              | 2                    | BCSTDCST                 |
| Time-dependent models        | Speciation variable and no extinction       | $\lambda(t)=\lambda_0e^{\alpha t}$ and $\mu(t)=0$                      | 2                    | BTimeVar                 |
|                              | Speciation variable and constant extinction | $\lambda(t)=\lambda_0e^{\alpha t}$ and $\mu(t)=\mu_0$                  | 3                    | BTimeVarDCST             |
|                              | Constant speciation and extinction variable | $\lambda(t)=\lambda_0$ and $\mu(t)=\mu_0e^{\beta t}$                   | 3                    | BCSTDTimeVar             |
|                              | Both speciation and extinction variable     | $\lambda(t)=\lambda_0e^{\alpha t}$ and $\mu(t)=\mu_0e^{\beta t}$       | 4                    | BTimeVarDTimeVar         |
| Temperature-dependent models | Speciation variable and no extinction       | $\lambda(t)=\lambda_0e^{\alpha T(t)}$ and $\mu(t)=0$                   | 2                    | BTempVar                 |
|                              | Speciation variable and constant extinction | $\lambda(t)=\lambda_0e^{\alpha T(t)}$ and $\mu(t)=\mu_0$               | 3                    | BTempVarDCST             |
|                              | Constant speciation and extinction variable | $\lambda(t)=\lambda_0$ and $\mu(t)=\mu_0e^{\beta T(t)}$                | 3                    | BCSTDTempVar             |
|                              | Both speciation and extinction variable     | $\lambda(t)=\lambda_0e^{\alpha T(t)}$ and $\mu(t)=\mu_0e^{\beta T(t)}$ | 4                    | BTempVarDTempVar         |
| Elevation-dependent models   | Speciation variable and no extinction       | $\lambda(t)=\lambda_0e^{\alpha A(t)}$ and $\mu(t)=0$                   | 2                    | BAndesVar                |
|                              | Speciation variable and constant extinction | $\lambda(t)=\lambda_0e^{\alpha A(t)}$ and $\mu(t)=\mu_0$               | 3                    | BAndesVarDCST            |
|                              | Constant speciation and extinction variable | $\lambda(t)=\lambda_0$ and $\mu(t)=\mu_0e^{\beta A(t)}$                | 3                    | BCSTDAndesVar            |
|                              | Both speciation and extinction variable     | $\lambda(t)=\lambda_0e^{\alpha A(t)}$ and $\mu(t)=\mu_0e^{\beta A(t)}$ | 4                    | BAndesVarDAndesVar       |

368

369 **Table 2.** Descriptions of the 14 different birth-death models fitted to the six Neotropical amphibian and  
370 squamate families, including speciation and extinction equations, the number of free parameters to  
371 optimize by maximum likelihood, and the acronym as used in Table 3, which reports the results per  
372 family.

373

374 higher under warm climatic conditions or when elevations were high, while a negative  $\alpha$  ( $\beta$ ) indicates  
375 that speciation (extinction) rates are higher under cold climatic conditions or when elevations were low  
376 (**Fig. 4B**).

377

378 We fitted each of the models to each phylogeny by maximum likelihood, starting with the  
379 simplest (constant rate) models and progressively increasing in complexity. The maximum-likelihood  
380 algorithm optimizes parameter values (of  $\lambda_0$ ,  $\mu_0$ ,  $\alpha$  and/or  $\beta$ ) that maximize the probability of the observed  
381 data (the phylogenetic tree) under a given model. Because these optimization algorithms can be  
382 sensitive to the choice of initial parameter values (they can converge to local optima in the vicinity of  
383 the initial parameter values), we informed the initial parameter values of more complex models by those  
384 previously estimated on simpler models. The 14 tested models are not all nested, and we used the  
385 corrected Akaike Information Criterion (AICc; Burnham and Anderson 2002) to compare models. The  
386 AICc is useful to compare the probability of observing branching times as explained by various  
387 individual paleoenvironmental variables (Condamine et al. 2015, 2018, 2019a). A series of models can  
388 be designed to quantify the effect that various environmental variables, taken in isolation, had on  
389 diversification. We thus compared the AICc scores for the best-fit models between multiple  
390 environmental variables (temperature, Andean uplift) to determine which has the strongest effect on  
391 diversification. The best-fitting model is selected using Akaike weights ( $AIC\omega$ ).

391

### 392 3. Results

393 Within the six clades, we found that three clades primarily supported an environment-independent  
394 model of diversification (**Figs. 5 and 6, Table 3**): the constant-rate model best fitted the diversification  
395 of Dendrobatidae ( $AIC\omega=0.523$ ;  $AIC\omega=0.286$  for the second best model that is a temperature-



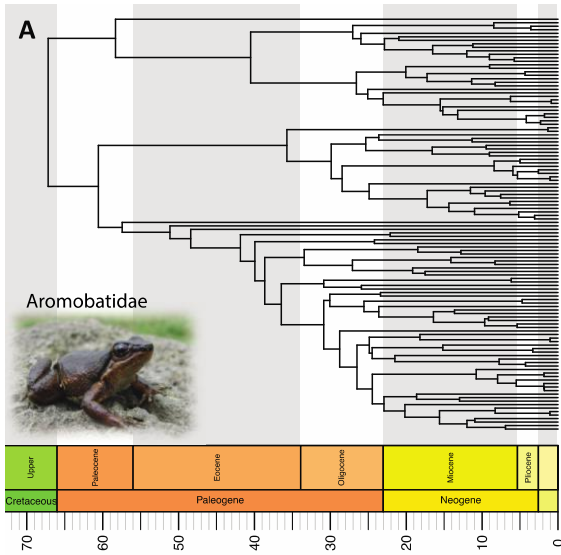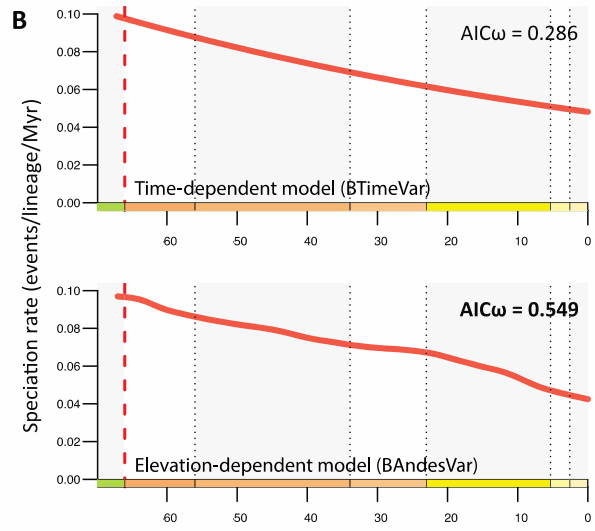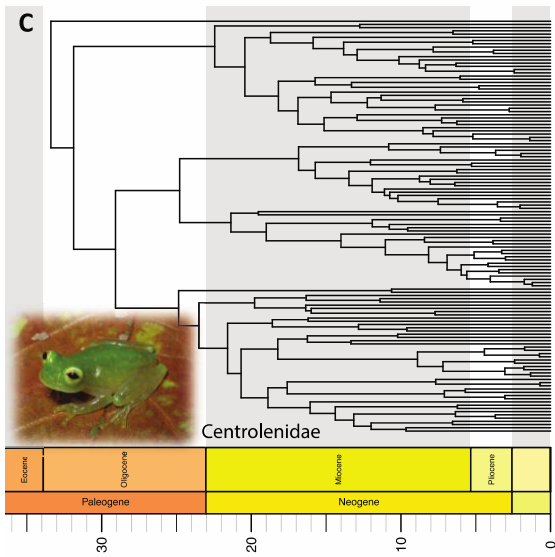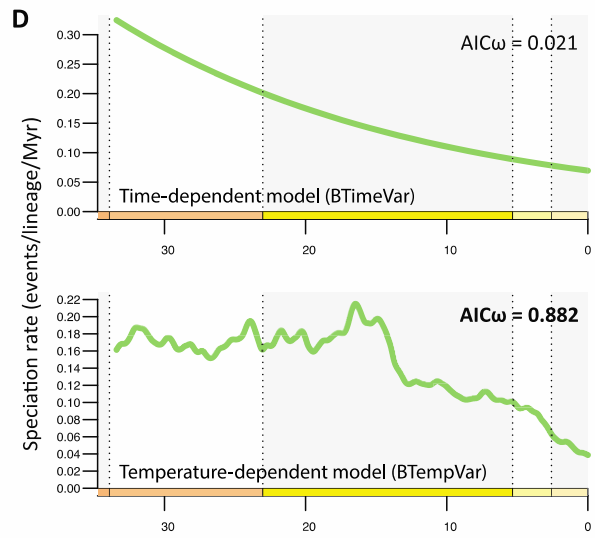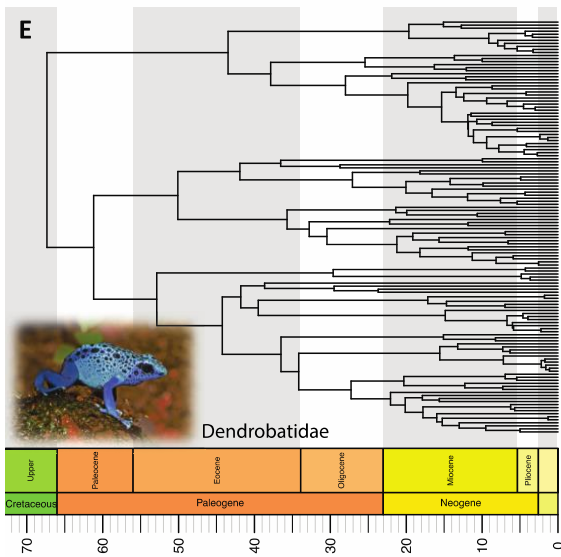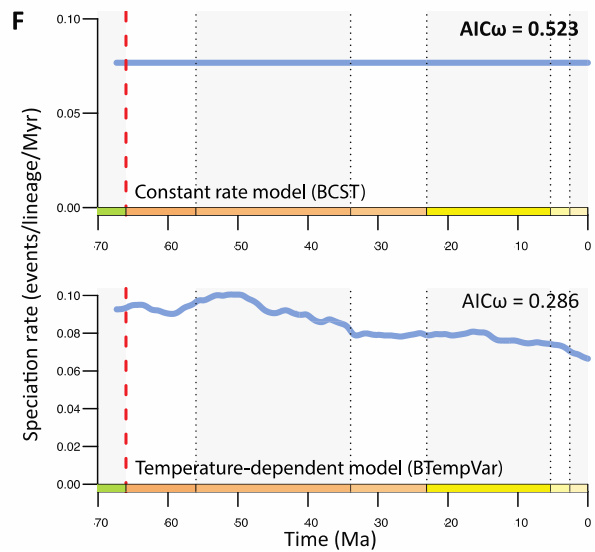

398

399

400



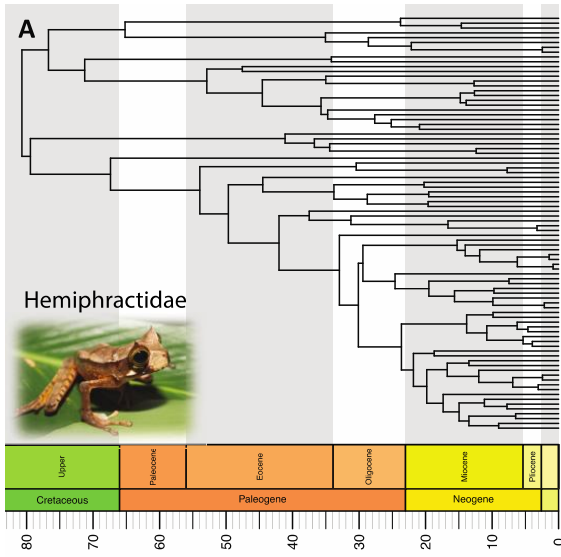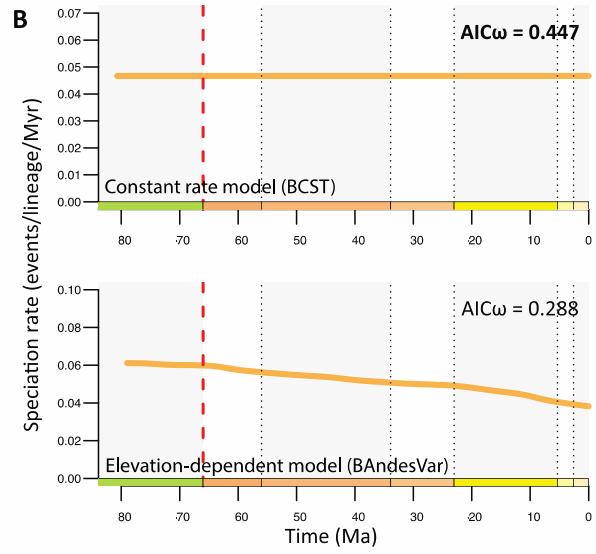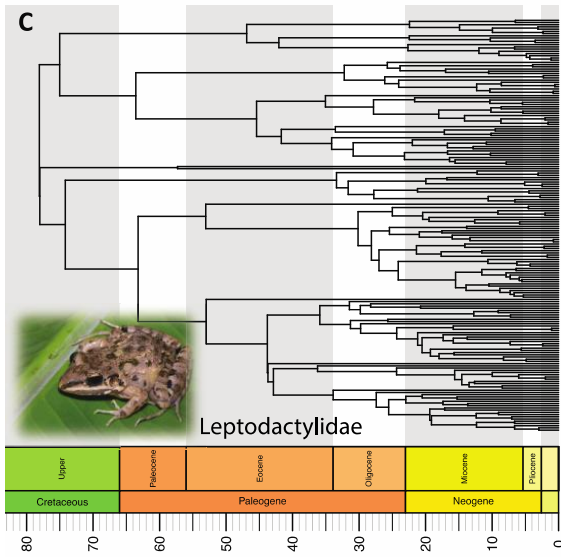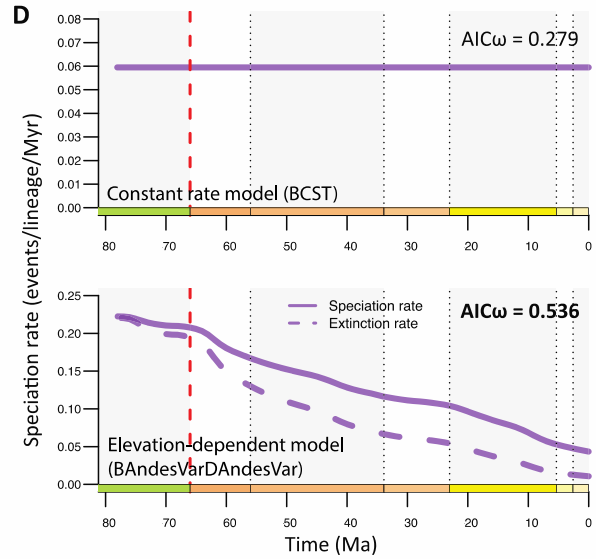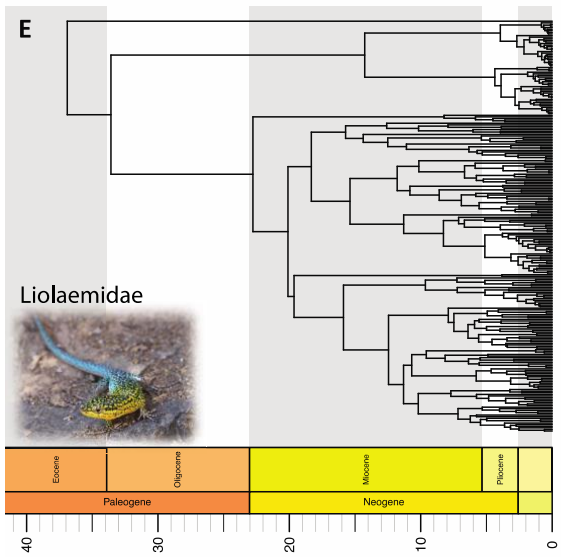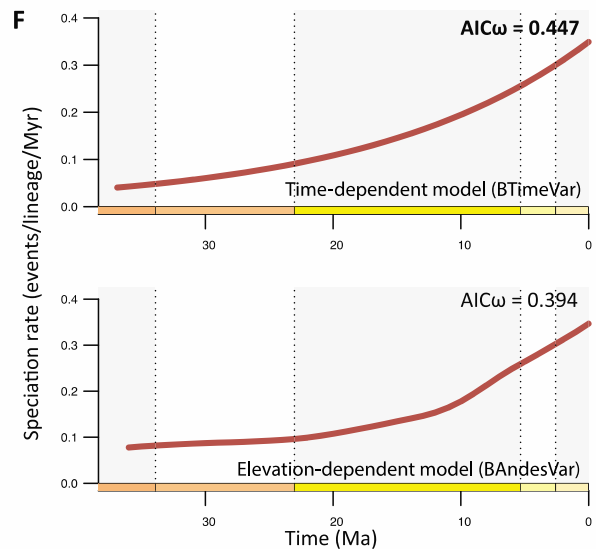

401

402

403

404 **Table 3 (previous pages).** Results of all diversification analyses performed on the six Neotropical  
405 amphibian and squamate families. Panels on the left report the models (14 in total), the number of  
406 parameters in each model, the estimated log-likelihood (logL), the corrected Akaike information  
407 criterion (AICc), the Akaike weight of the model considering all 14 models (AIC $\omega$ ), and the  
408 corresponding parameter estimates ( $\lambda_0$  = speciation rate at present,  $\alpha$  = parameter controlling the  
409 dependency of speciation rate on time or temperature,  $\mu_0$  = extinction rate at present, and  $\beta$  = parameter  
410 controlling the dependency of extinction rate on time or temperature). The best-fitting model is  
411 highlighted in bold. Panels on the right report the same, except the Akaike weight (AIC $\omega$ ) is now  
412 calculated after considering only the best-fit models of each of the three categories (environment-  
413 independent, temperature-dependent, elevation-dependent).

414

415 **Figure 5 (previous pages).** Estimating the diversification processes for three Neotropical frog families  
416 distributed in the Andes. Left panels show the time-calibrated phylogenies for three Neotropical frog  
417 families: A) Aromobatidae (cryptic forest frogs), C) Centrolenidae (glass frogs), and E) Dendrobatidae  
418 (poison dart frogs); from Hutter et al. (2017). Right panels show, for each family, the results of the best  
419 environment-independent diversification model (top panel) and of the best environment-dependent  
420 diversification model (bottom panel). Akaike weights (AIC $\omega$ ) for both models are shown and the best-  
421 fit model for each family is indicated in bold. Pictured for Aromobatidae is *Rheobates palmatus* by  
422 G.A. Chaves Portilla, for Centrolenidae is *Hyalinobatrachium fleischmanni* by M. Rivera Correa, and  
423 for Dendrobatidae is *Dendrobates tinctorius* by H. Zell.

424

425 **Figure 6 (previous pages).** Estimating the diversification processes for two Neotropical frog families  
426 and one Neotropical lizard family distributed in the Andes. Left panels show the time-calibrated  
427 phylogenies for three Neotropical frog families: A) Hemiphractidae (marsupial frogs), C)  
428 Leptodactylidae (southern frogs), and E) Liolaemidae (liolaemid lizards); from Hutter et al. (2017) and  
429 Esquerré et al. (2019). Right panels show, for each family, the results of the best environment-  
430 independent diversification model (top panel) and of the best environment-dependent diversification  
431 model (bottom panel). Leptodactylidae is the only clade for which extinction rates are estimated in the  
432 best-fit model, which are shown in panel D. Akaike weights (AIC $\omega$ ) for both models are shown and the  
433 best-fit model for each family is indicated in bold. Pictured for Hemiphractidae is *Gastrotheca cornuta*  
434 by B. Gratwicke, for Leptodactylidae is *Leptodactylus fragilis* by E. Alzate, and for Liolaemidae is  
435 *Liolaemus tenuis* by Kaldari.

436

437 dependent model, **Fig. 5E, F**) and of Hemiphractidae (AIC $\omega$ =0.447; AIC $\omega$ =0.288 for the second best  
438 model that is an elevation-dependent model, **Fig. 6A, B**), while the time-dependent model best explains  
439 the diversification of Liolaemidae (AIC $\omega$ =0.447; AIC $\omega$ =0.394 for the second best model that is an  
440 elevation-dependent model, **Fig. 6E, F**). The remaining three clades showed statistical support for an

441 environment-dependent model of diversification with either a temperature-dependent model for  
442 Centrolenidae ( $AIC_{\omega}=0.882$ ;  $AIC_{\omega}=0.096$  for the second best model that is an elevation-dependent  
443 model, **Fig. 5C, D**), or an elevation-dependent model for Aromobatidae ( $AIC_{\omega}=0.549$ ;  $AIC_{\omega}=0.286$   
444 for the second best model that is a time-dependent model, **Fig. 5A, B**), and Leptodactylidae  
445 ( $AIC_{\omega}=0.536$ ;  $AIC_{\omega}=0.279$  for the second best model that is a constant-rate model, **Fig. 6C, D**).

446 For Centrolenidae, the temperature-dependent model estimated a positive correlation between  
447 speciation rates and global temperatures ( $\alpha=0.2013$ , **Fig. 5D**), which translates into faster speciation  
448 during warmer periods. For the other five clades, the temperature-dependent model was not selected as  
449 the best-fit model, but did indicate a positive correlation between speciation rates and global  
450 temperatures, except for Liolaemidae (**Table 3**). The elevation-dependent model estimated a negative  
451 correlation between speciation rates and Andean elevation for both Aromobatidae and Leptodactylidae  
452 ( $\alpha=-6.00E-04$ ,  $-0.001$ , respectively, **Figs. 5B and 6D**). This implies that these groups diversified faster  
453 in the early stages of the Andean orogeny. Moreover, the model for Leptodactylidae indicated a negative  
454 correlation between extinction rates and Andean elevation ( $\beta=-0.0018$ ), which suggests higher  
455 extinction rates during the initial phase of mountain building.

456 Except for Liolaemidae, all elevation-dependent models (whether best-fit or not) estimated  
457 negative correlations between speciation rates and Andean elevation (**Table 3**), meaning high speciation  
458 rates during low elevations, and thus, during the early stages of the Andean orogeny. For Liolaemidae,  
459 one of the two younger (~37 Ma) clades, the best fit-model is a time-dependent model, which estimated  
460 an increase in speciation through time ( $\alpha=-0.0584$ ) with a speciation rate of  $\lambda_0=0.3491$   
461 events/lineage/Myr at present (**Fig. 6F**). However, it is important to mention the second best-fitting  
462 model indicating a positive correlation ( $\alpha=0.0011$ ) between speciation and Andean elevation, because  
463 the difference between the two best models is small ( $\Delta AIC_c=0.256$ , **Table 3**). Liolaemidae is the only  
464 studied clade showing a positive relationship between speciation and Andean elevation (**Fig. 6F**). This  
465 result suggests higher speciation rates during the later stages of Andean orogeny, when the Andes were  
466 higher.

467 The support for the models best explaining the diversification of the six clades is variable  
468 ( $AIC_{\omega}$  ranging from 0.231 to 0.60, with a mean of 0.316; **Table 3**), but always above the 0.071 weight  
469 (1/14) that would be expected if all models were equally likely. Nonetheless, after selecting the best-  
470 fitting model from each of the three main types (non-environment-dependent [including constant and  
471 time-dependent], temperature-dependent or elevation-dependent), and comparing only these three, the  
472 strength of support of the best-fitting models was reasonably high (mean  $AIC_{\omega}$  of 0.473 for non-  
473 environment-dependent models, 0.882 for temperature-dependent models, and 0.542 for elevation-  
474 dependent models). These values are consistently above the 0.33 (1/3) weight that would be expected  
475 if non-environment-dependent, temperature-dependent rate and elevation-dependent models models  
476 were equally likely.

477

## 478 **4. Discussion**

### 479 *4.1 Long-lived mountain building triggering both ancient and recent radiations*

480 We have studied potential drivers behind the diversification histories of six South American clades,  
481 four originating in the Late Cretaceous, and two during the latest Eocene-earliest Oligocene. We show  
482 that for Dendrobatidae, Hemiphractidae and Liolaemidae, the diversification history is likely primarily  
483 driven by environment-independent factors; for Centrolenidae, primarily by Cenozoic temperature  
484 variations, and for Aromobatidae and Leptodactylidae, primarily by Andean mountain building (**Figs.**  
485 **4 and 5**). Interestingly, the two clades for which we link diversification to Andean elevation  
486 (Aromobatidae and Leptodactylidae) diversified faster during the incipient (Late Cretaceous -  
487 Paleogene) phase of Andean orogeny. During this phase, the western margin of the South American  
488 continent transformed from a continental margin hosting a magmatic arc with localized topography only  
489 and average elevations below 1,000 m (Vergara et al. 1995; Boekhout et al. 2012; Horton 2018), into a  
490 fold-thrust belt with significant and continuous topography (Horton 2018; Boschman 2021; **Fig. 1**).  
491 During this time, the Andes were still significantly lower and less wide compared to their modern extent,  
492 but the first (arid) high-altitude habitats were appearing, especially in the southern (Mathiasen and  
493 Premoli 2010) and central (Quade et al. 2015) Andes.

494 Aromobatidae and Leptodactylidae are both widely distributed in the Andes, but for both  
495 clades, the center of species richness is located outside of the Andes. Nonetheless, for Aromobatidae,  
496 diversification has previously been linked to early Miocene uplift of the Eastern Cordillera of Colombia  
497 and the resulting middle Miocene onset of aridity in the Magdalena Valley (Muñoz-Ortiz et al. 2015).  
498 Additionally, indirect effects of Andean uplift shaped river and lake system dynamics in western  
499 Amazonia, which acted as a source of aromobatid diversity for the rest of Amazonia (Vacher et al. 2017;  
500 Réjaud et al. 2020). With this study, we now add evidence for the influence of early Andean orogeny  
501 to Aromobatidae and Leptodactylidae diversification (**Figs. 4B and 5D**). This result is in line with  
502 results from Santos et al. (2009), who concluded that montane habitats in the Guiana Shield and Atlantic  
503 Forest regions were colonized at a later stage.

504 Although diversification of Liolaemidae is best explained by an increase of speciation toward  
505 the present without invoking the role of environment, the second best-fit model (almost equally strong;  
506 **Fig. 5F**) indicates a positive relation between speciation rates and elevation. This result is in line with  
507 the study of Esquerré et al. (2019), who concluded that uplift of the Andes promoted Liolaemidae  
508 diversification through allopatric fragmentation, and acted as a species pump for the surrounding  
509 regions.

510 Perhaps surprisingly, our analyses did not select the elevation-dependent model as the best fit  
511 model for the hyloid frog clades Centrolenidae, Dendrobatidae and Hemiphractidae, contrary to  
512 previous conclusions reached concerning these groups (Hutter et al. 2017). For Centrolenidae, our  
513 analyses instead yielded strong support for the temperature-dependent model with high speciation rates  
514 during warm periods (**Fig. 4D, F**). This suggests a substantial effect of Cenozoic temperature variations

515 in shaping Neotropical diversification in the Andes; a model that had so far not been tested.  
516 Alternatively, these results could be misleading, because the temperature-model has been shown to fit  
517 well overall across tetrapod families (Condamine et al. 2019a). Finally, the best model for  
518 Dendrobatidae and Hemiphractidae is a model with constant speciation rates through time. For the latter  
519 clade, this model could reflect true evolutionary mechanisms, because marsupial frogs are unique  
520 among anurans in that the eggs develop on the back or in dorsal pouches in the female (Castroviejo-  
521 Fisher et al. 2015). Females of *Cryptobatrachus*, *Hemiphractus*, and *Stefania* carry their eggs and young  
522 on their backs, and in other hemiphractids, the eggs develop in a closed pouch (*Gastrotheca* and some  
523 *Flectonotus*) or in an open pouch (other *Flectonotus*). This breeding behaviour could buffer rates of  
524 diversification because these species are independent of water sources; they avoid the eggs having to  
525 hatch in ponds and develop as free-swimming tadpoles, which is prone to predation, and relies on  
526 favorable environmental conditions.

527 The effect of Paleogene orogeny that we report differs from the conclusions of a wealth of  
528 studies finding recent and rapid mountain clade radiations across the world's mountain belts (e.g.  
529 Leneveu et al. 2009; Mao et al. 2010; Drummond et al. 2012; Jabbour and Renner 2012; Wang et al.  
530 2012; Schwery et al. 2015; Lagomarsino et al. 2016; Esquerré et al. 2019; Ye et al. 2019). These findings  
531 do not contradict ours, but rather, it shows that so far, ancient mountain radiations have largely been  
532 undetected. In the study of Andean radiations, two of the main reasons for the absence of ancient  
533 radiations are the focus on Neogene Neotropical clades, and in some cases, the misconception that the  
534 bulk of Andean topography is young. By incorporating the early history of mountain building, and  
535 selecting old (Late Cretaceous) clades, we demonstrate the potential effect of the initial emergence of  
536 high-altitude habitats on diversification. This implies that throughout the long-lived history of surface  
537 uplift in the Andes, mountain building drove the diversification of different clades at different times,  
538 while not affecting yet other clades altogether.

539 An analogy can be made with the history of uplift and diversification in the Tibetan Plateau  
540 region. Renner (2016) showed that many macroevolutionary and biogeographic studies have linked  
541 (potentially non-existent) recent uplift to young and rapid radiations (e.g. Favre et al. 2015, 2016;  
542 Ebersbach et al. 2017; Ye et al. 2019), despite geological evidence pointing to an Eocene 4 km-high  
543 Tibetan Plateau. Although controversy about the uplift history of the Tibetan Plateau is not yet fully  
544 resolved (see e.g. Rowley and Garzzone 2007; Botsyun et al. 2019), both the synthesis of Renner (2016)  
545 and the current study illustrate the importance of accurate and detailed paleogeographic reconstructions  
546 that capture the complexity and heterogeneity of mountain building over geological time, and the  
547 importance of connecting geologists and biologists in the attempt to solve these interdisciplinary  
548 problems.

549

550 *4.2 Limitations of current modelling approaches and future perspectives*

551 Distinguishing between the drivers of diversification requires datasets that adequately sample large  
552 geographical and taxonomic scales through both long and short time intervals (e.g. Marx and Uhen  
553 2010; Eronen et al. 2015; Lagomarsino et al. 2016; Lehtonen et al. 2017; Condamine et al. 2018, 2019).  
554 To unravel the processes governing the tempo and mode of lineage diversification, phylogenies are  
555 required that encompass at least 80% of the total standing diversity within the clade of interest (e.g.  
556 Cusimano and Renner 2010; Höhna et al. 2011; Davis et al. 2013). This sampling ideally captures the  
557 entire range of ecological, geographic and morphological diversity, which requires accurate taxonomy,  
558 and clear documentation of the numbers of identifiable species in the region(s) of interest. As  
559 taxonomists remain underfunded, consensus on this basic information is not yet reached for all groups,  
560 yet is increasingly available for vertebrate groups. Knowledge of species ecology, including species  
561 interactions and species traits, may greatly enhance the design of macroevolutionary analyses in relation  
562 with hypotheses to test. Fortunately, phylogenies are increasingly improving, even in species-rich  
563 groups, and biological data, including morphology, ecology and distribution, are accumulating at an  
564 unprecedented rate (e.g. Pigot et al. 2020).

565 The state-of-the-art analytical framework used in this study is a step forward in our  
566 understanding of the diversification of lineages and its drivers, but is not without limitations. First, as  
567 with many macroevolutionary models, it suffers from the fundamental dilemma of extrapolation of  
568 correlations to causations. Second, difficulties remain in the estimation of speciation and extinction  
569 rates from phylogenies of extant species alone (e.g. Nee 2006; Ricklefs 2007; Rabosky and Lovette  
570 2008; Crisp and Cook 2009; Quental and Marshall 2010; Burin et al. 2019; Pannetier et al. 2021). For  
571 instance, simulation and empirical studies have shown that it is complicated to distinguish between  
572 decreasing speciation or increasing speciation when the net diversification rate declines through time  
573 (Rabosky and Lovette 2008; Crisp and Cook 2009). Furthermore, Burin et al. (2019) show that two  
574 popular methods perform equally well when varying speciation rates control decline, but when decline  
575 was only caused by an increase in extinction rates both methods wrongly assign the variation in net  
576 diversification to a drop in speciation. Several clades of our study show decay of speciation through  
577 time and no extinction (**Figs. 5 and 6**), and we thus remain cautious with these estimations. Recently,  
578 Pannetier et al. (2021) demonstrated that phylogenetic trees contain insufficient information to detect  
579 the presence or absence of diversity-dependent diversification, and we thus refrained ourselves to use  
580 this model although it can provide additional tests of macroevolutionary hypotheses on the role of  
581 within-clade species interactions compared to abiotic factors (Condamine et al. 2019a). Third, it remains  
582 challenging to decipher the direct drivers of speciation or extinction rates and events (Ezard et al. 2016),  
583 as for instance, paleoelevation *per se* may not be a direct driver of diversification, but rather, the many  
584 indirect consequences of uplift, such as habitat fragmentation or local climate change (Lagomarsino et  
585 al. 2016; Pérez-Escobar et al. 2017; Nevado et al. 2018). Furthermore, we here compare environment-  
586 independent, temperature-dependent and elevation-dependent birth-death models, but temperature and  
587 elevation are not the only possible drivers of diversification, as many other a(biotic) processes (e.g.

588 regional sea level variations, precipitation, erosion, interactions between species) may have played a  
589 role. However, compared to paleoelevation and global paleotemperature, quantifying or reconstructing  
590 these other possible drivers of diversification is a much bigger challenge, which hampers testing them  
591 in diversification models. In addition, it is questionable whether it truly is elevation (or temperature)  
592 that is driving diversification, rather than the change in elevation (or temperature). Although biological  
593 interpretation might become less straightforward, future studies might consider incorporating  
594 environmental-change diversification models, using the time-derivative of environmental variables.

595 To uncover the extent to which speciation and extinction vary and according to which drivers,  
596 macroevolutionary studies may need to combine diversification (birth-death) models with parametric  
597 biogeography models (Ree and Smith 2008; Quintero et al. 2015) or mechanistic eco-evolutionary  
598 simulation models (Rangel et al. 2018; Hagen et al. 2021). Such combined approaches can for example  
599 be used to estimate whether speciation occurred via allopatry (vicariance) or sympatry (ecological  
600 speciation), which specific factors in paleo-environmental change caused speciation and/or extinction,  
601 and in which locations these diversification events took place. It is worth mentioning that some models  
602 exist to test the role of diversity-dependence in the context of allopatry (Pigot et al. 2010; Valente et al.  
603 2015).

604 New developments in the field of trait-dependent models form a second line of research  
605 contributing to our understanding of the interactions between biotic and abiotic factors and their effects  
606 on diversity dynamics (Maddison et al. 2007; Goldberg et al. 2011; Beaulieu and O'Meara 2016).  
607 Cantalapiedra et al. (2014) developed a climate-based trait-dependent diversification model, in which  
608 rates of speciation not only vary as a function of the same global temperature curve that we incorporated  
609 into our analysis, but also among traits. The model is thereby able to identify differences in  
610 diversification history between clades with different functional traits as a function of changes in  
611 environment. Cantalapiedra et al. (2014) showed that ruminant clades with three feeding modes  
612 (browsers, grazers and mixed feeders) diversified differently during warm or cold periods.

613 A remaining, outstanding question is which role competition plays in ecologically similar  
614 clades that are phylogenetically unrelated (Benton 1987; Hembry & Weber 2020). Although it is  
615 difficult to model the effect of external clades interacting with the focal clade and their effects on  
616 speciation and/or extinction with current models, some progress has been made with fossil-based  
617 models showing that clade competition occurred over long timescales (Liow et al. 2015; Silvestro et al.  
618 2015). It is thus possible to assess the effect of competition on diversification, in which speciation and  
619 extinction rates are correlated with the diversity trajectory of another clade. Under competitive  
620 interaction scenarios, increasing species diversity has the effect of suppressing speciation rates and/or  
621 increasing extinction rates. Although in phylogenetic studies, diversity dependence is typically tested  
622 within a single clade (Etienne et al. 2012), our phylogeny-based diversification model can be extended  
623 to allow for competition among species that are not closely related, but share similar ecological niches  
624 (Condamine et al. 2020).

625           Lastly, studying the effects of environmental (i.e. climatic or geological) change requires  
626 accurate reconstructions of these changes through time. Despite the existence of contrasting datasets  
627 and resulting controversy, there is a relative abundance of data on the history of uplift of the two highest,  
628 largest (and most biodiverse) mountain belts on Earth: the Andes (see compilation in Boschman 2021)  
629 and the Tibetan Plateau-Himalayas-Hengduan mountains (e.g. An et al. 2001; Rowley and Garzzone  
630 2007; Botsyun et al. 2019), and to a lesser extent, of the North American Cordillera (e.g. Chamberlain  
631 et al. 2012). As a result, the majority of studies on environment-dependent diversification have focussed  
632 on these regions (Lagomarsino et al. 2016; Pérez-Escobar et al. 2017; Esquerré et al. 2019; Testo et al.  
633 2019; Ding et al. 2020). Working towards a global understanding of the relationship between  
634 environmental change and lineage diversification (Antonelli et al. 2018a; Quintero and Jetz 2018;  
635 Rahbek et al. 2019a,b) calls for the collection of paleoelevation data on lesser-studied smaller orogens,  
636 particularly in species rich regions, such as for example New Guinea, hosting the world's richest island  
637 flora (Cámara-Leret et al. 2020).

638           In conclusion, we still face important limitations in data availability as well as methodological  
639 shortcomings, but by acknowledging them we can target where to focus future efforts of the geological,  
640 macroevolutionary and biogeographical communities. Together, we may gain a better understanding of  
641 how environmental and biotic triggers are intertwined and of the rich, deep past of Earth's biological  
642 diversity. We hope that our approach (and analytical framework) will help the forward movement in  
643 that direction, and that it will provide perspectives for future investigations on other model groups, and  
644 in other regions.

645

## 646 **5. Conclusions**

647 Analyzing the role of paleogeographic and paleoclimatic history in species diversification through  
648 macroevolutionary analyses has never been more exciting and promising than today. The conjunction  
649 of rapid and massive increases in the availability of biological datasets (phylogenies, fossils,  
650 georeferenced occurrences and ecological traits) and paleoclimate and paleogeographic reconstructions  
651 on the one hand, and the successful development of powerful analytical tools on the other, now enables  
652 assessing the relative roles of climate change and mountain building on lineage diversification.

653           Here, we analysed the diversification history of six Neotropical frog and lizard families in light  
654 of Cenozoic climate variations and Andean mountain building. The recent (Neogene) rise of the Andes  
655 is often considered as the prime driver of biological diversification in the Neotropics, but here we unveil  
656 a more complex evolutionary history for ancient yet species-rich frog and lizard families. We find clade-  
657 specific responses to temperature and elevation, and conclude that throughout the long-lived history of  
658 surface uplift in the Andes, mountain building drove the diversification of different clades at different  
659 times, while not directly affecting other clades. Although we find that the diversification of  
660 Aromobatidae and Leptodactylidae was influenced by the rise of Andes, we conclude that this effect  
661 played a role in the Late Cretaceous-Paleogene phase of orogeny, much earlier than previously proposed



662 (i.e. Neogene). Moreover, we demonstrate that other drivers must be considered when studying  
663 mountain clade radiations: diversification rates of Centrolenidae were high during the warmer periods  
664 of the Cenozoic. Additionally, even a strict Andean-endemic lizard radiation shows mixed evidence for  
665 a direct role of Andean uplift driving the diversification. Therefore, our study argues that pre-Neogene  
666 environmental changes, either triggered by Andean uplift or resulting from global climate variations,  
667 should not be dismissed as drivers of Neotropical diversification, and calls for a greater appreciation of  
668 the ancient Andean paleo-elevation history in the build-up of species on the Earth's most biodiverse  
669 continent.

670

### 671 **Declaration of Competing Interest**

672 The authors declare that they have no known competing financial interests or personal relationships that  
673 could have appeared to influence the work reported in this paper.

674

### 675 **Data availability**

676 All data files (phylogenies, environmental variables) and scripts necessary to perform the analyses will  
677 be provided via an online repository (Figshare).

678

### 679 **Acknowledgements**

680 This work was funded by ETH postdoctoral fellowship 18-2 FEL-52, and by an “Investissements  
681 d'Avenir” grant managed by the Agence Nationale de la Recherche (CEBA, ref. ANR-10-LABX-25-  
682 01) and the ANR GAARAnti project (ANR-17-CE31-0009). We thank editor Daniele Silvestro, Pierre  
683 Sepulchre and an anonymous reviewer for very detailed and constructive comments, and Carina Hoorn  
684 for setting up this collaboration and the invitation to submit to this special issue.

685

### 686 **References**

- 687 Amante, C., & Eakins, B. W. (2009). ETOPO1 arc-minute global relief model: procedures, data  
688 sources and analysis. *NOAA National Centers for Environmental Information*.
- 689 An, Z., Kutzbach, J. E., Prell, W. L., & Porter, S. C. (2001). Evolution of Asian monsoons and phased  
690 uplift of the Himalaya–Tibetan plateau since Late Miocene times. *Nature*, *411*(6833), 62-66.
- 691 Anderson, V. J., Saylor, J. E., Shanahan, T. M., & Horton, B. K. (2015). Paleoelevation records from  
692 lipid biomarkers: Application to the tropical Andes. *Geological Society of America Bulletin*,  
693 *127*(11-12), 1604-1616.
- 694 Anderson, V. J., Horton, B. K., Saylor, J. E., Mora, A., Tesón, E., Breecker, D. O., & Ketcham, R. A.  
695 (2016). Andean topographic growth and basement uplift in southern Colombia: Implications  
696 for the evolution of the Magdalena, Orinoco, and Amazon river systems. *Geosphere*, *12*(4),  
697 1235-1256.
- 698 Antonelli, A., Nylander, J. A., Persson, C., & Sanmartín, I. (2009). Tracing the impact of the Andean  
699 uplift on Neotropical plant evolution. *Proceedings of the National Academy of Sciences*,  
700 *106*(24), 9749-9754.
- 701 Antonelli, A., & Sanmartín, I. (2011). Why are there so many plant species in the Neotropics? *Taxon*,  
702 *60*(2), 403-414.

- 703 Antonelli, A., Kissling, W. D., Flantua, S. G. A., Bermúdez, M. A., Mulch, A., Muellner-Riehl, A. N.,  
704 Kreft, H., Linder, H. P., Badgley, C., Fjeldså, J., Fritz, S. A., Rahbek, C., Herman, F.,  
705 Hooghiemstra, H., & Hoorn, C. (2018a). Geological and climatic influences on mountain  
706 biodiversity. *Nature Geoscience*, *11*(10), 718-725.
- 707 Antonelli, A., Zizka, A., Carvalho, F. A., Scharn, R., Bacon, C. D., Silvestro, D., & Condamine, F. L.  
708 (2018b). Amazonia is the primary source of Neotropical biodiversity. *Proceedings of the*  
709 *National Academy of Sciences*, *115*(23), 6034-6039.
- 710 Armijo, R., Lacassin, R., Coudurier-Curveur, A., & Carrizo, D. (2015). Coupled tectonic evolution of  
711 Andean orogeny and global climate. *Earth-Science Reviews*, *143*, 1-35.
- 712 Beaulieu, J. M., & O'Meara, B. C. (2016). Detecting hidden diversification shifts in models of trait-  
713 dependent speciation and extinction. *Systematic biology*, *65*(4), 583-601.
- 714 Benton, M. J. (1987). Progress and competition in macroevolution. *Biological Reviews*, *62*(3), 305-  
715 338.
- 716 Bermúdez, M., Hoorn, C., Bernet, M., Carrillo, E., Van Der Beek, P., Garver, J., Mora, J., &  
717 Mehrkian, K. (2017). The detrital record of late-Miocene to Pliocene surface uplift and  
718 exhumation of the Venezuelan Andes in the Maracaibo and Barinas foreland basins. *Basin*  
719 *Research*, *29*, 370-395.
- 720 Bershaw, J., Garzzone, C. N., Higgins, P., MacFadden, B. J., Anaya, F., & Alvarenga, H. (2010).  
721 Spatial-temporal changes in Andean plateau climate and elevation from stable isotopes of  
722 mammal teeth. *Earth and Planetary Science Letters*, *289*(3-4), 530-538.
- 723 Blisniuk, P. M., & Stern, L. A. (2005). Stable isotope paleoaltimetry: A critical review. *American*  
724 *Journal of Science*, *305*(10), 1033-1074.
- 725 Blisniuk, P. M., Stern, L. A., Chamberlain, C. P., Idleman, B., & Zeitler, P. K. (2005). Climatic and  
726 ecologic changes during Miocene surface uplift in the Southern Patagonian Andes. *Earth and*  
727 *Planetary Science Letters*, *230*(1), 125-142.
- 728 Blisniuk, P. M., Stern, L. A., Chamberlain, C. P., Zeitler, P. K., Ramos, V. A., Sobel, E. R., Haschke,  
729 M., Strecker, M. R., & Warkus, F. (2006). Links between mountain uplift, climate, and  
730 surface processes in the southern Patagonian Andes. In *The Andes* (pp. 429-440): Springer.
- 731 Boekhout, F., Spikings, R., Sempere, T., Chiaradia, M., Ulianov, A., & Schaltegger, U. (2012).  
732 Mesozoic arc magmatism along the southern Peruvian margin during Gondwana breakup and  
733 dispersal. *Lithos*, *146*, 48-64.
- 734 Boschman, L. M. (2021). Andean mountain building since the Late Cretaceous: A paleoelevation  
735 reconstruction. *Earth-Science Reviews*.
- 736 Botsyun, S., Sepulchre, P., Donnadiou, Y., Risi, C., Licht, A., & Rugenstein, J. K. C. (2019). Revised  
737 paleoaltimetry data show low Tibetan Plateau elevation during the Eocene. *Science*,  
738 *363*(6430), eaaq1436.
- 739 Botsyun, S., Ehlers, T., Mutz, S., Methner, K., Krsnik, E., & Mulch, A. (2020). Opportunities and  
740 challenges for paleoaltimetry in “small” orogens: Insights from the European Alps.  
741 *Geophysical Research Letters*, *47*(4), e2019GL086046.
- 742 Bruhn, R. L., & Dalziel, I. W. (1977). Destruction of the Early Cretaceous marginal basin in the  
743 Andes of Tierra del Fuego. *Island Arcs, Deep Sea Trenches and Back-Arc Basins*, *1*, 395-405.
- 744 Brumfield, R. T., & Edwards, S. V. (2007). Evolution into and out of the Andes: a Bayesian analysis  
745 of historical diversification in *Thamnophilus* antshrikes. *Evolution*, *61*(2), 346-367.
- 746 Burin, G., Alencar, L. R., Chang, J., Alfaro, M. E., & Quental, T. B. (2019). How well can we  
747 estimate diversity dynamics for clades in diversity decline? *Systematic biology*, *68*(1), 47-62.
- 748 Burnham, D., & Anderson, K. (2002). Model selection and multimodel inference: a practical  
749 information-theoretic approach. In Springer, New York.
- 750 Cámara-Leret, R., Frodin, D. G., Adema, F., Anderson, C., Appelhans, M. S., Argent, G., Guerrero, S.  
751 A., Ashton, P., Baker, W. J., & Barfod, A. S. (2020). New Guinea has the world's richest  
752 island flora. *Nature*, *584*(7822), 579-583.
- 753 Canavan, R. R., Carrapa, B., Clementz, M. T., Quade, J., DeCelles, P. G., & Schoenbohm, L. M.  
754 (2014). Early Cenozoic uplift of the Puna Plateau, Central Andes, based on stable isotope  
755 paleoaltimetry of hydrated volcanic glass. *Geology*, *42*(5), 447-450.
- 756 Cantalapiedra, J. L., FitzJohn, R. G., Kuhn, T. S., Fernández, M. H., DeMiguel, D., Azanza, B.,  
757 Morales, J., & Mooers, A. Ø. (2014). Dietary innovations spurred the diversification of

- 758 ruminants during the Cenozoic. *Proceedings of the Royal Society B: Biological Sciences*,  
759 281(1776), 20132746.
- 760 Carrapa, B., Strecker, M. R., & Sobel, E. R. (2006). Cenozoic orogenic growth in the Central Andes:  
761 Evidence from sedimentary rock provenance and apatite fission track thermochronology in  
762 the Fiambalá Basin, southernmost Puna Plateau margin (NW Argentina). *Earth and Planetary  
763 Science Letters*, 247(1-2), 82-100.
- 764 Carrapa, B., Huntington, K. W., Clementz, M., Quade, J., Bywater-Reyes, S., Schoenbohm, L. M., &  
765 Canavan, R. R. (2014). Uplift of the Central Andes of NW Argentina associated with upper  
766 crustal shortening, revealed by multiproxy isotopic analyses. *Tectonics*, 33(6), 1039-1054.
- 767 Castroviejo-Fisher, S., DE LA RIVA, I., POMBAL JR, J. P., da Silva, H. R., Rojas-Runjaic, F. J.,  
768 MEDINA-MÉNDEZ, E., & FROST, D. R. (2015). Phylogenetic systematics of egg-brooding  
769 frogs (Anura: Hemiphractidae) and the evolution of direct development. *Zootaxa*, 4004(1), 1-  
770 75.
- 771 Chamberlain, C., Poage, M., Craw, D., & Reynolds, R. (1999). Topographic development of the  
772 Southern Alps recorded by the isotopic composition of authigenic clay minerals, South Island,  
773 New Zealand. *Chemical Geology*, 155(3-4), 279-294.
- 774 Chamberlain, C. P., Mix, H. T., Mulch, A., Hren, M. T., Kent-Corson, M. L., Davis, S. J., Horton, T.  
775 W., & Graham, S. A. (2012). The Cenozoic climatic and topographic evolution of the western  
776 North American Cordillera. *American Journal of Science*, 312(2), 213-262.
- 777 Chazot, N., Willmott, K. R., Condamine, F. L., De-Silva, D. L., Freitas, A. V., Lamas, G., Morlon, H.,  
778 Giraldo, C. E., Jiggins, C. D., & Joron, M. (2016). Into the Andes: multiple independent  
779 colonizations drive montane diversity in the Neotropical clearwing butterflies Godyridina.  
780 *Molecular ecology*, 25(22), 5765-5784.
- 781 Chazot, N., Willmott, K. R., Lamas, G., Freitas, A. V., Piron-Prunier, F., Arias, C. F., Mallet, J., De-  
782 Silva, D. L., & Elias, M. (2019). Renewed diversification following Miocene landscape  
783 turnover in a Neotropical butterfly radiation. *Global Ecology and Biogeography*, 28(8), 1118-  
784 1132.
- 785 Colwyn, D. A., Brandon, M. T., Hren, M. T., Hourigan, J., Pacini, A., Cosgrove, M. G., Midzik, M.,  
786 Garreaud, R. D., & Metzger, C. (2019). Growth and steady state of the Patagonian Andes.  
787 *American Journal of Science*, 319(6), 431-472.
- 788 Condamine, F. L., Rolland, J., & Morlon, H. (2013). Macroevolutionary perspectives to  
789 environmental change. *Ecology letters*, 16, 72-85.
- 790 Condamine, F. L., Toussaint, E. F., Clamens, A.-L., Genson, G., Sperling, F. A., & Kergoat, G. J.  
791 (2015). Deciphering the evolution of birdwing butterflies 150 years after Alfred Russel  
792 Wallace. *Scientific Reports*, 5(11860), 1-11.
- 793 Condamine, F. L., Rolland, J., Höhna, S., Sperling, F. A., & Sanmartín, I. (2018). Testing the role of  
794 the Red Queen and Court Jester as drivers of the macroevolution of Apollo butterflies.  
795 *Systematic biology*, 67(6), 940-964.
- 796 Condamine, F. L., Rolland, J., & Morlon, H. (2019a). Assessing the causes of diversification  
797 slowdowns: temperature-dependent and diversity-dependent models receive equivalent  
798 support. *Ecology letters*, 22(11), 1900-1912.
- 799 Condamine, F. L., Romieu, J., & Guinot, G. (2019b). Climate cooling and clade competition likely  
800 drove the decline of lamniform sharks. *Proceedings of the National Academy of Sciences*,  
801 116(41), 20584-20590.
- 802 Condamine, F. L., Silvestro, D., Koppelhus, E. B., & Antonelli, A. (2020). The rise of angiosperms  
803 pushed conifers to decline during global cooling. *Proceedings of the National Academy of  
804 Sciences*, 117(46), 28867-28875.
- 805 Cortés, A. J., Garzón, L. N., Valencia, J. B., & Madriñán, S. (2018). On the causes of rapid  
806 diversification in the páramos: isolation by ecology and genomic divergence in espeletia.  
807 *Frontiers in plant science*, 9, 1700.
- 808 Cramer, B., Miller, K., Barrett, P., & Wright, J. (2011). Late Cretaceous–Neogene trends in deep  
809 ocean temperature and continental ice volume: Reconciling records of benthic foraminiferal  
810 geochemistry ( $\delta^{18}\text{O}$  and Mg/Ca) with sea level history. *Journal of Geophysical Research:*  
811 *Oceans*, 116(C12).

- 812 Crisp, M. D., & Cook, L. G. (2009). Explosive radiation or cryptic mass extinction? Interpreting  
813 signatures in molecular phylogenies. *Evolution: International Journal of Organic Evolution*,  
814 63(9), 2257-2265.
- 815 Cuesta, F., Muriel, P., Llambí, L. D., Halloy, S., Aguirre, N., Beck, S., Carilla, J., Meneses, R. I.,  
816 Cuello, S., & Grau, A. (2017). Latitudinal and altitudinal patterns of plant community  
817 diversity on mountain summits across the tropical Andes. *Ecography*, 40(12), 1381-1394.
- 818 Cusimano, N., & Renner, S. S. (2010). Slowdowns in diversification rates from real phylogenies may  
819 not be real. *Systematic biology*, 59(4), 458-464.
- 820 Dalziel, I. W., De Wit, M. J., & Palmer, K. F. (1974). Fossil marginal basin in the southern Andes.  
821 *Nature*, 250(5464), 291-294.
- 822 Davis, D., Suppe, J., & Dahlen, F. (1983). Mechanics of fold-and-thrust belts and accretionary  
823 wedges. *Journal of Geophysical Research: Solid Earth*, 88(B2), 1153-1172.
- 824 Davis, K. E., Hill, J., Astrop, T. I., & Wills, M. A. (2016). Global cooling as a driver of diversification  
825 in a major marine clade. *Nature Communications*, 7(1), 13003.
- 826 Davis, M. P., Midford, P. E., & Maddison, W. (2013). Exploring power and parameter estimation of  
827 the BiSSE method for analyzing species diversification. *BMC evolutionary biology*, 13(1), 38.
- 828 Delsuc, F., Vizcaíno, S. F., & Douzery, E. J. (2004). Influence of Tertiary paleoenvironmental  
829 changes on the diversification of South American mammals: a relaxed molecular clock study  
830 within xenarthrans. *BMC evolutionary biology*, 4(1), 11.
- 831 Ding, W.-N., Ree, R. H., Spicer, R. A., & Xing, Y.-W. (2020). Ancient orogenic and monsoon-driven  
832 assembly of the world's richest temperate alpine flora. *Science*, 369(6503), 578-581.
- 833 Drummond, C. S., Eastwood, R. J., Miotto, S. T., & Hughes, C. E. (2012). Multiple continental  
834 radiations and correlates of diversification in *Lupinus* (Leguminosae): testing for key  
835 innovation with incomplete taxon sampling. *Systematic biology*, 61(3), 443-460.
- 836 Ebersbach, J., Schnitzler, J., Favre, A., & Muellner-Riehl, A. (2017). Evolutionary radiations in the  
837 species-rich mountain genus *Saxifraga* L. *BMC evolutionary biology*, 17(1), 119.
- 838 Egan, A. N., & Crandall, K. A. (2008). Divergence and diversification in North American Psoraleae  
839 (Fabaceae) due to climate change. *BMC Biology*, 6(1), 55.
- 840 Eronen, J. T., Janis, C. M., Chamberlain, C. P., & Mulch, A. (2015). Mountain uplift explains  
841 differences in Palaeogene patterns of mammalian evolution and extinction between North  
842 America and Europe. *Proceedings of the Royal Society B: Biological Sciences*, 282(1809),  
843 20150136.
- 844 Erwin, D. H. (2009). Climate as a driver of evolutionary change. *Current Biology*, 19(14), R575-  
845 R583.
- 846 Esquerré, D., Brennan, I. G., Catullo, R. A., Torres-Pérez, F., & Keogh, J. S. (2019). How mountains  
847 shape biodiversity: The role of the Andes in biogeography, diversification, and reproductive  
848 biology in South America's most species-rich lizard radiation (Squamata: Liolaemidae).  
849 *Evolution*, 73(2), 214-230.
- 850 Etienne, R. S., Haegeman, B., Stadler, T., Aze, T., Pearson, P. N., Purvis, A., & Phillimore, A. B.  
851 (2012). Diversity-dependence brings molecular phylogenies closer to agreement with the  
852 fossil record. *Proceedings of the Royal Society B: Biological Sciences*, 279(1732), 1300-1309.
- 853 Ezard, T. H., Aze, T., Pearson, P. N., & Purvis, A. (2011). Interplay between changing climate and  
854 species' ecology drives macroevolutionary dynamics. *Science*, 332(6027), 349-351.
- 855 Ezard, T. H., Quental, T. B., & Benton, M. J. (2016). The challenges to inferring the regulators of  
856 biodiversity in deep time. In: The Royal Society.
- 857 Fan, J.-x., Shen, S.-z., Erwin, D. H., Sadler, P. M., MacLeod, N., Cheng, Q.-m., Hou, X.-d., Yang, J.,  
858 Wang, X.-d., & Wang, Y. (2020). A high-resolution summary of Cambrian to Early Triassic  
859 marine invertebrate biodiversity. *Science*, 367(6475), 272-277.
- 860 Fauquette, S., Bernet, M., Suc, J.-P., Grosjean, A.-S., Guillot, S., Van Der Beek, P., Jourdan, S.,  
861 Popescu, S.-M., Jiménez-Moreno, G., & Bertini, A. (2015). Quantifying the Eocene to  
862 Pleistocene topographic evolution of the southwestern Alps, France and Italy. *Earth and  
863 Planetary Science Letters*, 412, 220-234.
- 864 Favre, A., Päckert, M., Pauls, S. U., Jähnig, S. C., Uhl, D., Michalak, I., & Muellner-Riehl, A. N.  
865 (2015). The role of the uplift of the Qinghai-Tibetan Plateau for the evolution of Tibetan  
866 biotas. *Biological Reviews*, 90(1), 236-253.

- 867 Favre, A., Michalak, I., Chen, C. H., Wang, J. C., Pringle, J. S., Matuszak, S., Sun, H., Yuan, Y. M.,  
868 Struwe, L., & Muellner-Riehl, A. N. (2016). Out-of-Tibet: The spatio-temporal evolution of  
869 *Gentiana* (Gentianaceae). *Journal of Biogeography*, *43*(10), 1967-1978.
- 870 Fiorella, R. P., Poulsen, C. J., Zolá, R. S. P., Jeffery, M. L., & Ehlers, T. A. (2015). Modern and long-  
871 term evaporation of central Andes surface waters suggests paleo archives underestimate  
872 Neogene elevations. *Earth and Planetary Science Letters*, *432*, 59-72.
- 873 Fosdick, J. C., Romans, B. W., Fildani, A., Bernhardt, A., Calderón, M., & Graham, S. A. (2011).  
874 Kinematic evolution of the Patagonian retroarc fold-and-thrust belt and Magallanes foreland  
875 basin, Chile and Argentina, 51°30' S. *Bulletin*, *123*(9-10), 1679-1698.
- 876 Fouquet, A., Blotto, B. L., Maronna, M. M., Verdade, V. K., Juncá, F. A., de Sá, R., & Rodrigues, M.  
877 T. (2013). Unexpected phylogenetic positions of the genera *Rupirana* and *Crossodactylodes*  
878 reveal insights into the biogeography and reproductive evolution of leptodactylid frogs.  
879 *Molecular phylogenetics and evolution*, *67*(2), 445-457.
- 880 Fouquet, A., Santana Cassini, C., Fernando Baptista Haddad, C., Pech, N., & Trefaut Rodrigues, M.  
881 (2014). Species delimitation, patterns of diversification and historical biogeography of the N  
882 eotropical frog genus *Adenomera* (Anura, Leptodactylidae). *Journal of Biogeography*, *41*(5),  
883 855-870.
- 884 Garzione, C. N., Hoke, G. D., Libarkin, J. C., Withers, S., MacFadden, B., Eiler, J., Ghosh, P., &  
885 Mulch, A. (2008). Rise of the Andes. *Science*, *320*(5881), 1304-1307.
- 886 Garzione, C. N., Auerbach, D. J., Smith, J. J.-S., Rosario, J. J., Passey, B. H., Jordan, T. E., & Eiler, J.  
887 M. (2014). Clumped isotope evidence for diachronous surface cooling of the Altiplano and  
888 pulsed surface uplift of the Central Andes. *Earth and Planetary Science Letters*, *393*, 173-  
889 181.
- 890 Gentry, A. H. (1982). Neotropical floristic diversity: phytogeographical connections between Central  
891 and South America, Pleistocene climatic fluctuations, or an accident of the Andean orogeny?  
892 *Annals of the Missouri Botanical Garden*, *69*(3), 557-593.
- 893 Giambiagi, L., Mescua, J., Bechis, F., Hoke, G., Suriano, J., Spagnotto, S., Moreiras, S. M., Lossada,  
894 A., Mazzitelli, M., & Dapoza, R. T. (2016). Cenozoic orogenic evolution of the southern  
895 central Andes (32–36° S). In *Growth of the Southern Andes* (pp. 63-98): Springer.
- 896 Goldberg, E. E., Lancaster, L. T., & Ree, R. H. (2011). Phylogenetic inference of reciprocal effects  
897 between geographic range evolution and diversification. *Systematic biology*, *60*(4), 451-465.
- 898 Gómez, E., Jordan, T. E., Allmendinger, R. W., & Cardozo, N. (2005a). Development of the  
899 Colombian foreland-basin system as a consequence of diachronous exhumation of the  
900 northern Andes. *Geological Society of America Bulletin*, *117*(9-10), 1272-1292.
- 901 Gómez, E., Jordan, T. E., Allmendinger, R. W., Hegarty, K., & Kelley, S. (2005b). Syntectonic  
902 Cenozoic sedimentation in the northern middle Magdalena Valley Basin of Colombia and  
903 implications for exhumation of the Northern Andes. *Geological Society of America Bulletin*,  
904 *117*(5-6), 547-569.
- 905 Gregory-Wodzicki, K. M., McIntosh, W., & Velasquez, K. (1998). Climatic and tectonic implications  
906 of the late Miocene Jakokkota flora, Bolivian Altiplano. *Journal of South American Earth*  
907 *Sciences*, *11*(6), 533-560.
- 908 Gregory-Wodzicki, K. M. (2000). Uplift history of the Central and Northern Andes: A review. *GSA*  
909 *Bulletin*, *112*(7), 1091-1105.
- 910 Hagen, O., Flück, B., Fopp, F., Cabral, J. S., Hartig, F., Pontarp, M., Rangel, T. F., & Pellissier, L.  
911 (2021). gen3sis: A general engine for eco-evolutionary simulations of the processes that shape  
912 Earth's biodiversity. *PLoS Biology*, *19*(7), e3001340.
- 913 Hannisdal, B., & Peters, S. E. (2011). Phanerozoic Earth system evolution and marine biodiversity.  
914 *Science*, *334*(6059), 1121-1124.
- 915 Hansen, J., Sato, M., Russell, G., & Kharecha, P. (2013). Climate sensitivity, sea level and  
916 atmospheric carbon dioxide. *Philosophical Transactions of the Royal Society A:*  
917 *Mathematical, Physical and Engineering Sciences*, *371*(2001), 20120294.
- 918 Hazzi, N. A., Moreno, J. S., Ortiz-Movliav, C., & Palacio, R. D. (2018). Biogeographic regions and  
919 events of isolation and diversification of the endemic biota of the tropical Andes. *Proceedings*  
920 *of the National Academy of Sciences*, *115*(31), 7985-7990.

- 921 Hembry, D. H., & Weber, M. G. (2020). Ecological interactions and macroevolution: a new field with  
922 old roots. *Annual Review of Ecology, Evolution, and Systematics*, 51.
- 923 Hernández, R., Jordan, T., Farjat, A. D., Echavarría, L., Idleman, B., & Reynolds, J. (2005). Age,  
924 distribution, tectonics, and eustatic controls of the Paranense and Caribbean marine  
925 transgressions in southern Bolivia and Argentina. *Journal of South American Earth Sciences*,  
926 19(4), 495-512.
- 927 Höhna, S., Stadler, T., Ronquist, F., & Britton, T. (2011). Inferring speciation and extinction rates  
928 under different sampling schemes. *Molecular biology and evolution*, 28(9), 2577-2589.
- 929 Hoke, G. D., Giambiagi, L. B., Garzione, C. N., Mahoney, J. B., & Strecker, M. R. (2014). Neogene  
930 paleoelevation of intermontane basins in a narrow, compressional mountain range, southern  
931 Central Andes of Argentina. *Earth and Planetary Science Letters*, 406, 153-164.
- 932 Hoorn, C., Wesselingh, F., Ter Steege, H., Bermudez, M., Mora, A., Sevink, J., Sanmartín, I.,  
933 Sanchez-Meseguer, A., Anderson, C., & Figueiredo, J. (2010). Amazonia through time:  
934 Andean uplift, climate change, landscape evolution, and biodiversity. *Science*, 330(6006),  
935 927-931.
- 936 Hoorn, C., & Wesselingh, F. (2011). *Amazonia: landscape and species evolution: a look into the past*.  
937 John Wiley & Sons.
- 938 Hoorn, C., Mosbrugger, V., Mulch, A., & Antonelli, A. (2013). Biodiversity from mountain building.  
939 *Nature Geoscience*, 6, 154. Correspondence.
- 940 Hoorn, C., Perrigo, A., & Antonelli, A. (2018). *Mountains, climate and biodiversity*: John Wiley &  
941 Sons.
- 942 Horton, B. K. (2018). Sedimentary record of Andean mountain building. *Earth-Science Reviews*, 178,  
943 279-309.
- 944 Hughes, C., & Eastwood, R. (2006). Island radiation on a continental scale: exceptional rates of plant  
945 diversification after uplift of the Andes. *Proceedings of the National Academy of Sciences*,  
946 103(27), 10334-10339.
- 947 Hughes, C. E., & Atchison, G. W. (2015). The ubiquity of alpine plant radiations: from the Andes to  
948 the Hengduan Mountains. *New Phytologist*, 207(2), 275-282.
- 949 Hutter, C. R., Lambert, S. M., & Wiens, J. J. (2017). Rapid diversification and time explain  
950 amphibian richness at different scales in the Tropical Andes, Earth's most biodiverse hotspot.  
951 *The American Naturalist*, 190(6), 828-843.
- 952 Jabbour, F., & Renner, S. S. (2012). A phylogeny of Delphinieae (Ranunculaceae) shows that  
953 Aconitum is nested within Delphinium and that Late Miocene transitions to long life cycles in  
954 the Himalayas and Southwest China coincide with bursts in diversification. *Molecular*  
955 *phylogenetics and evolution*, 62(3), 928-942.
- 956 Jaramillo, C., Rueda, M. J., & Mora, G. (2006). Cenozoic plant diversity in the Neotropics. *Science*,  
957 311(5769), 1893-1896.
- 958 Josse, C., Cuesta, F., Navarro, G., Barrena, V., Becerra, M. T., Cabrera, E., Chacón-Moreno, E.,  
959 Ferreira, W., Peralvo, M., & Saito, J. (2011). Physical geography and ecosystems in the  
960 tropical Andes. *SK Herzog, R. Martínez, PM Jørgensen y H. Tiessen (comps.), Climate*  
961 *Change and Biodiversity in the Tropical Andes. São José dos Campos y París: Instituto*  
962 *Interamericano para la Investigación del Cambio Global y Comité Científico sobre*  
963 *Problemas del Medio Ambiente*.
- 964 Kar, N., Garzione, C. N., Jaramillo, C., Shanahan, T., Carlotto, V., Pullen, A., Moreno, F., Anderson,  
965 V., Moreno, E., & Eiler, J. (2016). Rapid regional surface uplift of the northern Altiplano  
966 plateau revealed by multiproxy paleoclimate reconstruction. *Earth and Planetary Science*  
967 *Letters*, 447, 33-47.
- 968 Kohn, M., Spear, F., Harrison, T., & Dalziel, I. (1995). 40Ar/39Ar geochronology and P-T-t paths  
969 from the Cordillera Darwin metamorphic complex, Tierra del Fuego, Chile. *Journal of*  
970 *Metamorphic Geology*, 13(2), 251-270.
- 971 Körner, C., Jetz, W., Paulsen, J., Payne, D., Rudmann-Maurer, K., & Spehn, E. M. (2017). A global  
972 inventory of mountains for bio-geographical applications. *Alpine Botany*, 127(1), 1-15.
- 973 Lagomarsino, L. P., Condamine, F. L., Antonelli, A., Mulch, A., & Davis, C. C. (2016). The abiotic  
974 and biotic drivers of rapid diversification in Andean bellflowers (Campanulaceae). *New*  
975 *Phytologist*, 210(4), 1430-1442.

- 976 Lehtonen, S., Silvestro, D., Karger, D. N., Scotese, C., Tuomisto, H., Kessler, M., Peña, C.,  
977 Wahlberg, N., & Antonelli, A. (2017). Environmentally driven extinction and opportunistic  
978 origination explain fern diversification patterns. *Scientific Reports*, 7(1), 1-12.
- 979 Leier, A., McQuarrie, N., Garziona, C., & Eiler, J. (2013). Stable isotope evidence for multiple pulses  
980 of rapid surface uplift in the Central Andes, Bolivia. *Earth and Planetary Science Letters*,  
981 371, 49-58.
- 982 Leneveu, J., Chichvarkhin, A., & Wahlberg, N. (2009). Varying rates of diversification in the genus  
983 *Melitaea* (Lepidoptera: Nymphalidae) during the past 20 million years. *Biological Journal of*  
984 *the Linnean Society*, 97(2), 346-361.
- 985 Linder, H. P. (2008). Plant species radiations: where, when, why? *Philosophical Transactions of the*  
986 *Royal Society B: Biological Sciences*, 363(1506), 3097-3105.
- 987 Liow, L. H., Reitan, T., & Harnik, P. G. (2015). Ecological interactions on macroevolutionary time  
988 scales: clams and brachiopods are more than ships that pass in the night. *Ecology letters*,  
989 18(10), 1030-1039.
- 990 Liu, X., Xu, Q., & Ding, L. (2016). Differential surface uplift: Cenozoic paleoelevation history of the  
991 Tibetan Plateau. *Science China Earth Sciences*, 59(11), 2105-2120.
- 992 Luebert, F., & Weigend, M. (2014). Phylogenetic insights into Andean plant diversification. *Frontiers*  
993 *in Ecology and Evolution*, 2, 27.
- 994 Maddison, W. P., Midford, P. E., & Otto, S. P. (2007). Estimating a binary character's effect on  
995 speciation and extinction. *Systematic biology*, 56(5), 701-710.
- 996 Madriñán, S., Cortés, A. J., & Richardson, J. E. (2013). Páramo is the world's fastest evolving and  
997 coolest biodiversity hotspot. *Frontiers in genetics*, 4, 192.
- 998 Mao, K., Hao, G., Liu, J., Adams, R. P., & Milne, R. I. (2010). Diversification and biogeography of  
999 *Juniperus* (Cupressaceae): variable diversification rates and multiple intercontinental  
1000 dispersals. *New Phytologist*, 188(1), 254-272.
- 1001 Marx, F. G., & Uhen, M. D. (2010). Climate, critters, and cetaceans: Cenozoic drivers of the  
1002 evolution of modern whales. *Science*, 327(5968), 993-996.
- 1003 Mathiasen, P., & Premoli, A. C. (2010). Out in the cold: genetic variation of *Nothofagus pumilio*  
1004 (*Nothofagaceae*) provides evidence for latitudinally distinct evolutionary histories in austral  
1005 South America. *Molecular ecology*, 19(2), 371-385.
- 1006 Mayhew, P. J., Bell, M. A., Benton, T. G., & McGowan, A. J. (2012). Biodiversity tracks temperature  
1007 over time. *Proceedings of the National Academy of Sciences*, 109(38), 15141-15145.
- 1008 Mittermeier, R., Gil, P., Hoffmann, M., & Pilgrim, J. (2004). Hotspots: Earth's biologically richest  
1009 and most threatened terrestrial ecoregions. *Conserv. Int*, 400.
- 1010 Molnar, P., England, P., & Martinod, J. (1993). Mantle dynamics, uplift of the Tibetan Plateau, and  
1011 the Indian monsoon. *Reviews of Geophysics*, 31(4), 357-396.
- 1012 Montes, C., Cardona, A., Jaramillo, C., Pardo, A., Silva, J., Valencia, V., Ayala, C., Pérez-Angel, L.,  
1013 Rodríguez-Parra, L., & Ramirez, V. (2015). Middle Miocene closure of the Central American  
1014 seaway. *Science*, 348(6231), 226-229.
- 1015 Montes, C., Rodríguez-Corcho, A. F., Bayona, G., Hoyos, N., Zapata, S., & Cardona, A. (2019).  
1016 Continental margin response to multiple arc-continent collisions: The northern Andes-  
1017 Caribbean margin. *Earth-Science Reviews*, 198, 102903.
- 1018 Morlon, H., Parsons, T. L., & Plotkin, J. B. (2011). Reconciling molecular phylogenies with the fossil  
1019 record. *Proceedings of the National Academy of Sciences*, 108(39), 16327-16332.
- 1020 Morlon, H. (2014). Phylogenetic approaches for studying diversification. *Ecology letters*, 17(4), 508-  
1021 525.
- 1022 Morlon, H., Lewitus, E., Condamine, F. L., Manceau, M., Clavel, J., & Drury, J. (2016). RPANDA:  
1023 an R package for macroevolutionary analyses on phylogenetic trees. *Methods in Ecology and*  
1024 *Evolution*, 7(5), 589-597.
- 1025 Muellner-Riehl, A. N., Schnitzler, J., Kissling, W. D., Mosbrugger, V., Rijdsdijk, K. F.,  
1026 Seijmonsbergen, A. C., Versteegh, H., & Favre, A. (2019). Origins of global mountain plant  
1027 biodiversity: Testing the 'mountain-geobiodiversity hypothesis'. *Journal of Biogeography*,  
1028 46, 2826-2838.
- 1029 Muñoz-Ortiz, A., Velásquez-Álvarez, Á. A., Guarnizo, C. E., & Crawford, A. J. (2015). Of peaks and  
1030 valleys: testing the roles of orogeny and habitat heterogeneity in driving allopatry in mid-

- 1031 elevation frogs (Aromobatidae: *Rheobates*) of the northern Andes. *Journal of Biogeography*,  
1032 42(1), 193-205.
- 1033 Mutke, J., Jacobs, R., Meyers, K., Henning, T., & Weigend, M. (2014). Diversity patterns of selected  
1034 Andean plant groups correspond to topography and habitat dynamics, not orogeny. *Frontiers*  
1035 *in genetics*, 5, 351.
- 1036 Myers, N., Mittermeier, R. A., Mittermeier, C. G., Da Fonseca, G. A., & Kent, J. (2000). Biodiversity  
1037 hotspots for conservation priorities. *Nature*, 403(6772), 853-858.
- 1038 Nakajima, T., Danhara, T., Iwano, H., & Chinzei, K. (2006). Uplift of the Ou Backbone Range in  
1039 Northeast Japan at around 10 Ma and its implication for the tectonic evolution of the eastern  
1040 margin of Asia. *Palaeogeography, Palaeoclimatology, Palaeoecology*, 241(1), 28-48.
- 1041 Nee, S., Holmes, E. C., May, R. M., & Harvey, P. H. (1994). Extinction rates can be estimated from  
1042 molecular phylogenies. *Philosophical Transactions of the Royal Society of London. Series B:*  
1043 *Biological Sciences*, 344(1307), 77-82.
- 1044 Nee, S. (2006). Birth-death models in macroevolution. *Annu. Rev. Ecol. Evol. Syst.*, 37, 1-17.
- 1045 Nevado, B., Contreras-Ortiz, N., Hughes, C., & Filatov, D. A. (2018). Pleistocene glacial cycles drive  
1046 isolation, gene flow and speciation in the high-elevation Andes. *New Phytologist*, 219(2),  
1047 779-793.
- 1048 O’Dea, A., Lessios, H. A., Coates, A. G., Eytan, R. I., Restrepo-Moreno, S. A., Cione, A. L., Collins,  
1049 L. S., De Queiroz, A., Farris, D. W., & Norris, R. D. (2016). Formation of the Isthmus of  
1050 Panama. *Science Advances*, 2(8), e1600883.
- 1051 Pannetier, T., Martinez, C., Bunnefeld, L., & Etienne, R. S. (2021). Branching patterns in phylogenies  
1052 cannot distinguish diversity-dependent diversification from time-dependent diversification.  
1053 *Evolution*, 75(1), 25-38.
- 1054 Pérez-Escobar, O. A., Gottschling, M., Chomicki, G., Condamine, F. L., Klitgård, B. B., Pansarin, E.,  
1055 & Gerlach, G. (2017). Andean mountain building did not preclude dispersal of lowland  
1056 epiphytic orchids in the Neotropics. *Scientific Reports*, 7(1), 1-10.
- 1057 Pérez-Escobar, O. A., Chomicki, G., Condamine, F. L., Karremans, A. P., Bogarín, D., Matzke, N. J.,  
1058 Silvestro, D., & Antonelli, A. (2017). Recent origin and rapid speciation of Neotropical  
1059 orchids in the world's richest plant biodiversity hotspot. *New Phytologist*, 215(2), 891-905.
- 1060 Pigot, A. L., Phillimore, A. B., Owens, I. P., & Orme, C. D. L. (2010). The shape and temporal  
1061 dynamics of phylogenetic trees arising from geographic speciation. *Systematic biology*, 59(6),  
1062 660-673.
- 1063 Pigot, A. L., Sheard, C., Miller, E. T., Bregman, T. P., Freeman, B. G., Roll, U., Seddon, N., Trisos,  
1064 C. H., Weeks, B. C., & Tobias, J. A. (2020). Macroevolutionary convergence connects  
1065 morphological form to ecological function in birds. *Nature Ecology & Evolution*, 4(2), 230-  
1066 239.
- 1067 Quade, J., Dettinger, M., Carrapa, B., DeCelles, P., Murray, K., Huntington, K., Cartwright, A.,  
1068 Canavan, R., Gehrels, G., & Clementz, M. (2015). The growth of the central Andes, 22 S–26  
1069 S. *Geological Society of America Memoirs*, 212, 277-308.
- 1070 Quental, T. B., & Marshall, C. R. (2010). Diversity dynamics: molecular phylogenies need the fossil  
1071 record. *Trends in Ecology & Evolution*, 25(8), 434-441.
- 1072 Quintero, I., Keil, P., Jetz, W., & Crawford, F. W. (2015). Historical biogeography using species  
1073 geographical ranges. *Systematic biology*, 64(6), 1059-1073.
- 1074 Quintero, I., & Jetz, W. (2018). Global elevational diversity and diversification of birds. *Nature*,  
1075 555(7695), 246-250.
- 1076 Rabosky, D. L., & Lovette, I. J. (2008). Explosive evolutionary radiations: decreasing speciation or  
1077 increasing extinction through time? *Evolution*, 62(8), 1866-1875.
- 1078 Rahbek, C., Borregaard, M. K., Antonelli, A., Colwell, R. K., Holt, B. G., Nogues-Bravo, D.,  
1079 Rasmussen, C. M., Richardson, K., Rosing, M. T., & Whittaker, R. J. (2019a). Building  
1080 mountain biodiversity: Geological and evolutionary processes. *Science*, 365(6458), 1114-  
1081 1119.
- 1082 Rahbek, C., Borregaard, M. K., Colwell, R. K., Dalsgaard, B., Holt, B. G., Morueta-Holme, N.,  
1083 Nogues-Bravo, D., Whittaker, R. J., & Fjeldså, J. (2019b). Humboldt’s enigma: What causes  
1084 global patterns of mountain biodiversity? *Science*, 365(6458), 1108-1113.



- 1085 Rangel, T. F., Edwards, N. R., Holden, P. B., Diniz-Filho, J. A. F., Gosling, W. D., Coelho, M. T. P.,  
1086 Cassemiro, F. A., Rahbek, C., & Colwell, R. K. (2018). Modeling the ecology and evolution  
1087 of biodiversity: Biogeographical cradles, museums, and graves. *Science*, *361*(6399),  
1088 eaar5452.
- 1089 Ree, R. H., & Smith, S. A. (2008). Maximum likelihood inference of geographic range evolution by  
1090 dispersal, local extinction, and cladogenesis. *Systematic biology*, *57*(1), 4-14.
- 1091 Réjaud, A., Rodrigues, M. T., Crawford, A. J., Castroviejo-Fisher, S., Jaramillo, A. F., Chaparro, J.  
1092 C., Glaw, F., Gagliardi-Urrutia, G., Moravec, J., & De la Riva, I. J. (2020). Historical  
1093 biogeography identifies a possible role of Miocene wetlands in the diversification of the  
1094 Amazonian rocket frogs (Aromobatidae: Allobates). *Journal of Biogeography*, *47*(11), 2472-  
1095 2482.
- 1096 Renner, S. S. (2016). Available data point to a 4-km-high Tibetan Plateau by 40 Ma, but 100  
1097 molecular-clock papers have linked supposed recent uplift to young node ages. *Journal of*  
1098 *Biogeography*, *43*(8), 1479-1487.
- 1099 Ricklefs, R. E. (2007). Estimating diversification rates from phylogenetic information. *Trends in*  
1100 *Ecology & Evolution*, *22*(11), 601-610.
- 1101 Rohrmann, A., Sachse, D., Mulch, A., Pingel, H., Tofelde, S., Alonso, R. N., & Strecker, M. R.  
1102 (2016). Miocene orographic uplift forces rapid hydrological change in the southern central  
1103 Andes. *Scientific Reports*, *6*, 35678.
- 1104 Rowley, D. B., & Garzzone, C. N. (2007). Stable isotope-based paleoaltimetry. *Annu. Rev. Earth*  
1105 *Planet. Sci.*, *35*, 463-508.
- 1106 Santos, J. C., Coloma, L. A., Summers, K., Caldwell, J. P., Ree, R., & Cannatella, D. C. (2009).  
1107 Amazonian amphibian diversity is primarily derived from late Miocene Andean lineages.  
1108 *PLoS Biol*, *7*(3), e1000056.
- 1109 Santos, M. T. T., de Magalhães, R. F., Lyra, M. L., Santos, F. R., Zaher, H., Giasson, L. O., Garcia, P.  
1110 C., Carnaval, A. C., & Haddad, C. F. (2020). Multilocus phylogeny of Paratelmatobiinae  
1111 (Anura: Leptodactylidae) reveals strong spatial structure and previously unknown diversity in  
1112 the Atlantic Forest hotspot. *Molecular phylogenetics and evolution*, 106819.
- 1113 Sarmiento-Rojas, L. F. (2019). Cretaceous stratigraphy and paleo-facies maps of northwestern South  
1114 America. In *Geology and Tectonics of Northwestern South America* (pp. 673-747): Springer.
- 1115 Saylor, J. E., & Horton, B. K. (2014). Nonuniform surface uplift of the Andean plateau revealed by  
1116 deuterium isotopes in Miocene volcanic glass from southern Peru. *Earth and Planetary*  
1117 *Science Letters*, *387*, 120-131.
- 1118 Scheuber, E., Mertmann, D., Ege, H., Silva-González, P., Heubeck, C., Reutter, K.-J., & Jacobshagen,  
1119 V. (2006). Exhumation and basin development related to formation of the central Andean  
1120 plateau, 21 S. In *The Andes* (pp. 285-301): Springer.
- 1121 Schwery, O., Onstein, R. E., Bouchenak-Khelladi, Y., Xing, Y., Carter, R. J., & Linder, H. P. (2015).  
1122 As old as the mountains: the radiations of the Ericaceae. *New Phytologist*, *207*(2), 355-367.
- 1123 Sepulchre, P., Sloan, L. C., & Fluteau, F. (2010). Modelling the response of Amazonian climate to the  
1124 uplift of the Andean mountain range. *Amazonia: Landscape and Species Evolution: A look*  
1125 *into the past*, 211-222.
- 1126 Silvestro, D., Salamin, N., & Schnitzler, J. (2014). PyRate: a new program to estimate speciation and  
1127 extinction rates from incomplete fossil data. *Methods in Ecology and Evolution*, *5*(10), 1126-  
1128 1131.
- 1129 Silvestro, D., Antonelli, A., Salamin, N., & Quental, T. B. (2015). The role of clade competition in the  
1130 diversification of North American canids. *Proceedings of the National Academy of Sciences*,  
1131 *112*(28), 8684-8689.
- 1132 Silvestro, D., Salamin, N., Antonelli, A., & Meyer, X. (2019). Improved estimation of  
1133 macroevolutionary rates from fossil data using a Bayesian framework. *Paleobiology*, *45*(4),  
1134 546-570.
- 1135 Simpson, G. G. (1980). Splendid isolation: the curious history of South American mammals.
- 1136 Spicer, R. A., Su, T., Valdes, P. J., Farnsworth, A., Wu, F.-X., Shi, G., Spicer, T. E., & Zhou, Z.  
1137 (2020). Why the 'Uplift of the Tibetan Plateau' is a myth. *National Science Review*.

- 1138 Squeo, F. A., Veit, H., Arancio, G., Gutierrez, J. R., Arroyo, M. T., & Olivares, N. (1993). Spatial  
1139 heterogeneity of high mountain vegetation in the Andean desert zone of Chile. *Mountain*  
1140 *Research and Development*, 203-209.
- 1141 Stadler, T. (2013). Recovering speciation and extinction dynamics based on phylogenies. *Journal of*  
1142 *evolutionary biology*, 26(6), 1203-1219.
- 1143 Testo, W. L., Sessa, E., & Barrington, D. S. (2019). The rise of the Andes promoted rapid  
1144 diversification in Neotropical *Phlegmariurus* (Lycopodiaceae). *New Phytologist*, 222(1), 604-  
1145 613.
- 1146 Toussaint, E. F., Dias, F. M., Mielke, O. H., Casagrande, M. M., Sañudo-Restrepo, C. P., Lam, A.,  
1147 Morinière, J., Balke, M., & Vila, R. (2019). Flight over the Proto-Caribbean seaway:  
1148 Phylogeny and macroevolution of Neotropical Anaeni leafwing butterflies. *Molecular*  
1149 *phylogenetics and evolution*, 137, 86-103.
- 1150 Uba, C. E., Heubeck, C., & Hulka, C. (2006). Evolution of the late Cenozoic Chaco foreland basin,  
1151 southern Bolivia. *Basin Research*, 18(2), 145-170.
- 1152 Vacher, J.-P., Kok, P. J., Rodrigues, M. T., Lima, J. D., Lorenzini, A., Martinez, Q., Fallet, M.,  
1153 Courtois, E. A., Blanc, M., & Gaucher, P. (2017). Cryptic diversity in Amazonian frogs:  
1154 Integrative taxonomy of the genus *Anomaloglossus* (Amphibia: Anura: Aromobatidae)  
1155 reveals a unique case of diversification within the Guiana Shield. *Molecular phylogenetics*  
1156 *and evolution*, 112, 158-173.
- 1157 Valente, L. M., Phillimore, A. B., & Etienne, R. S. (2015). Equilibrium and non-equilibrium  
1158 dynamics simultaneously operate in the Galápagos islands. *Ecology letters*, 18(8), 844-852.
- 1159 Veizer, J., & Prokoph, A. (2015). Temperatures and oxygen isotopic composition of Phanerozoic  
1160 oceans. *Earth-Science Reviews*, 146, 92-104.
- 1161 Vergara, M., Levi, B., Nyström, J. O., & Cancino, A. (1995). Jurassic and Early Cretaceous island arc  
1162 volcanism, extension, and subsidence in the Coast Range of central Chile. *Geological Society*  
1163 *of America Bulletin*, 107(12), 1427-1440.
- 1164 Villagómez, D., Spikings, R., Mora, A., Guzmán, G., Ojeda, G., Cortés, E., & Van Der Lelij, R.  
1165 (2011). Vertical tectonics at a continental crust-oceanic plateau plate boundary zone: Fission  
1166 track thermochronology of the Sierra Nevada de Santa Marta, Colombia. *Tectonics*, 30(4).
- 1167 Wang, L., Schneider, H., Zhang, X.-C., & Xiang, Q.-P. (2012). The rise of the Himalaya enforced the  
1168 diversification of SE Asian ferns by altering the monsoon regimes. *BMC Plant Biology*,  
1169 12(1), 210.
- 1170 Westerhold, T., Marwan, N., Drury, A. J., Liebrand, D., Agnini, C., Anagnostou, E., Barnet, J. S.,  
1171 Bohaty, S. M., De Vleeschouwer, D., & Florindo, F. (2020). An astronomically dated record  
1172 of Earth's climate and its predictability over the last 66 million years. *Science*, 369(6509),  
1173 1383-1387.
- 1174 Wilf, P., Cúneo, N. R., Johnson, K. R., Hicks, J. F., Wing, S. L., & Obradovich, J. D. (2003). High  
1175 plant diversity in Eocene South America: evidence from Patagonia. *Science*, 300(5616), 122-  
1176 125.
- 1177 Xing, Y., & Ree, R. H. (2017). Uplift-driven diversification in the Hengduan Mountains, a temperate  
1178 biodiversity hotspot. *Proceedings of the National Academy of Sciences*, 114(17), E3444-  
1179 E3451.
- 1180 Ye, X. Y., Ma, P. F., Yang, G. Q., Guo, C., Zhang, Y. X., Chen, Y. M., Guo, Z. H., & Li, D. Z.  
1181 (2019). Rapid diversification of alpine bamboos associated with the uplift of the Hengduan  
1182 Mountains. *Journal of Biogeography*, 46(12), 2678-2689.
- 1183 Zaffos, A., Finnegan, S., & Peters, S. E. (2017). Plate tectonic regulation of global marine animal  
1184 diversity. *Proceedings of the National Academy of Sciences*, 114 (22), 5653-5658.
- 1185

1186

1187

1188

1189

1190 Supplementary materials with

1191 **Mountain radiations are not only rapid and recent: Ancient diversification of South American**  
1192 **frog and lizard families related to Paleogene Andean orogeny and Cenozoic climate variations**

1193 *By Boschman and Condamine*

1194

1195

1196 **Supplementary Table 1.** Equations (from Hansen et al., 2013, modified by Westerhold et al. 2020) to  
1197 calculate deep-ocean temperature ( $T_{do}$ ) and surface air temperature ( $T_s$ ) from  $\delta^{18}O$  data.

1198

---

**$\delta^{18}O$  to  $T_{do}$ :**

---

0.0 Ma to 3.660 Ma:  $T_{do} (^{\circ}C) = 1 - 4.4 * ((\delta^{18}O (‰) - 3.25 / 3)$

3.660 Ma to 34.025 Ma:  $T_{do} (^{\circ}C) = 5 - 8 * ((\delta^{18}O (‰) - 1.75 / 3)$

34.025 Ma to 67.0 Ma:  $T_{do} (^{\circ}C) = (-4 * \delta^{18}O (‰)) + 12$

---

**$T_{do}$  to  $T_s$ :**

---

0.0 Ma to 1.81 Ma:  $T_s (^{\circ}C) = 2 * T_{do} + 12.25$

1.81 Ma to 5.33 Ma:  $T_s (^{\circ}C) = 2.5 * T_{do} + 12.15$

5.33 Ma to 67.0 Ma:  $T_s (^{\circ}C) = T_{do} + 14.15$

---

1199

1200

1201

1202 **Supplementary Figure 1.** Distribution ranges of Aromobatidae, Centrolenidae and Dendrobatidae.

1203 From GBIF (the Global Biodiversity Information Facility, [www.gbif.com](http://www.gbif.com)).

1204

1205 **Supplementary Figure 2.** Distribution ranges of Hemiphractidae, Leptodactylidae, Liolaemidae. From

1206 GBIF (the Global Biodiversity Information Facility, [www.gbif.com](http://www.gbif.com)).

1207

1208

1209

1210

1211 Hansen, J., Sato, M., Russell, G., & Kharecha, P. (2013). Climate sensitivity, sea level and

1212 atmospheric carbon dioxide. *Philosophical Transactions of the Royal Society A:*

1213 *Mathematical, Physical and Engineering Sciences*, 371(2001), 20120294.

1214 Westerhold, T., Marwan, N., Drury, A. J., Liebrand, D., Agnini, C., Anagnostou, E., Barnet, J. S.,

1215 Bohaty, S. M., De Vleeschouwer, D., & Florindo, F. (2020). An astronomically dated record

1216 of Earth's climate and its predictability over the last 66 million years. *Science*, 369(6509),

1217 1383-1387.

1218

1219

1220

1221

1222

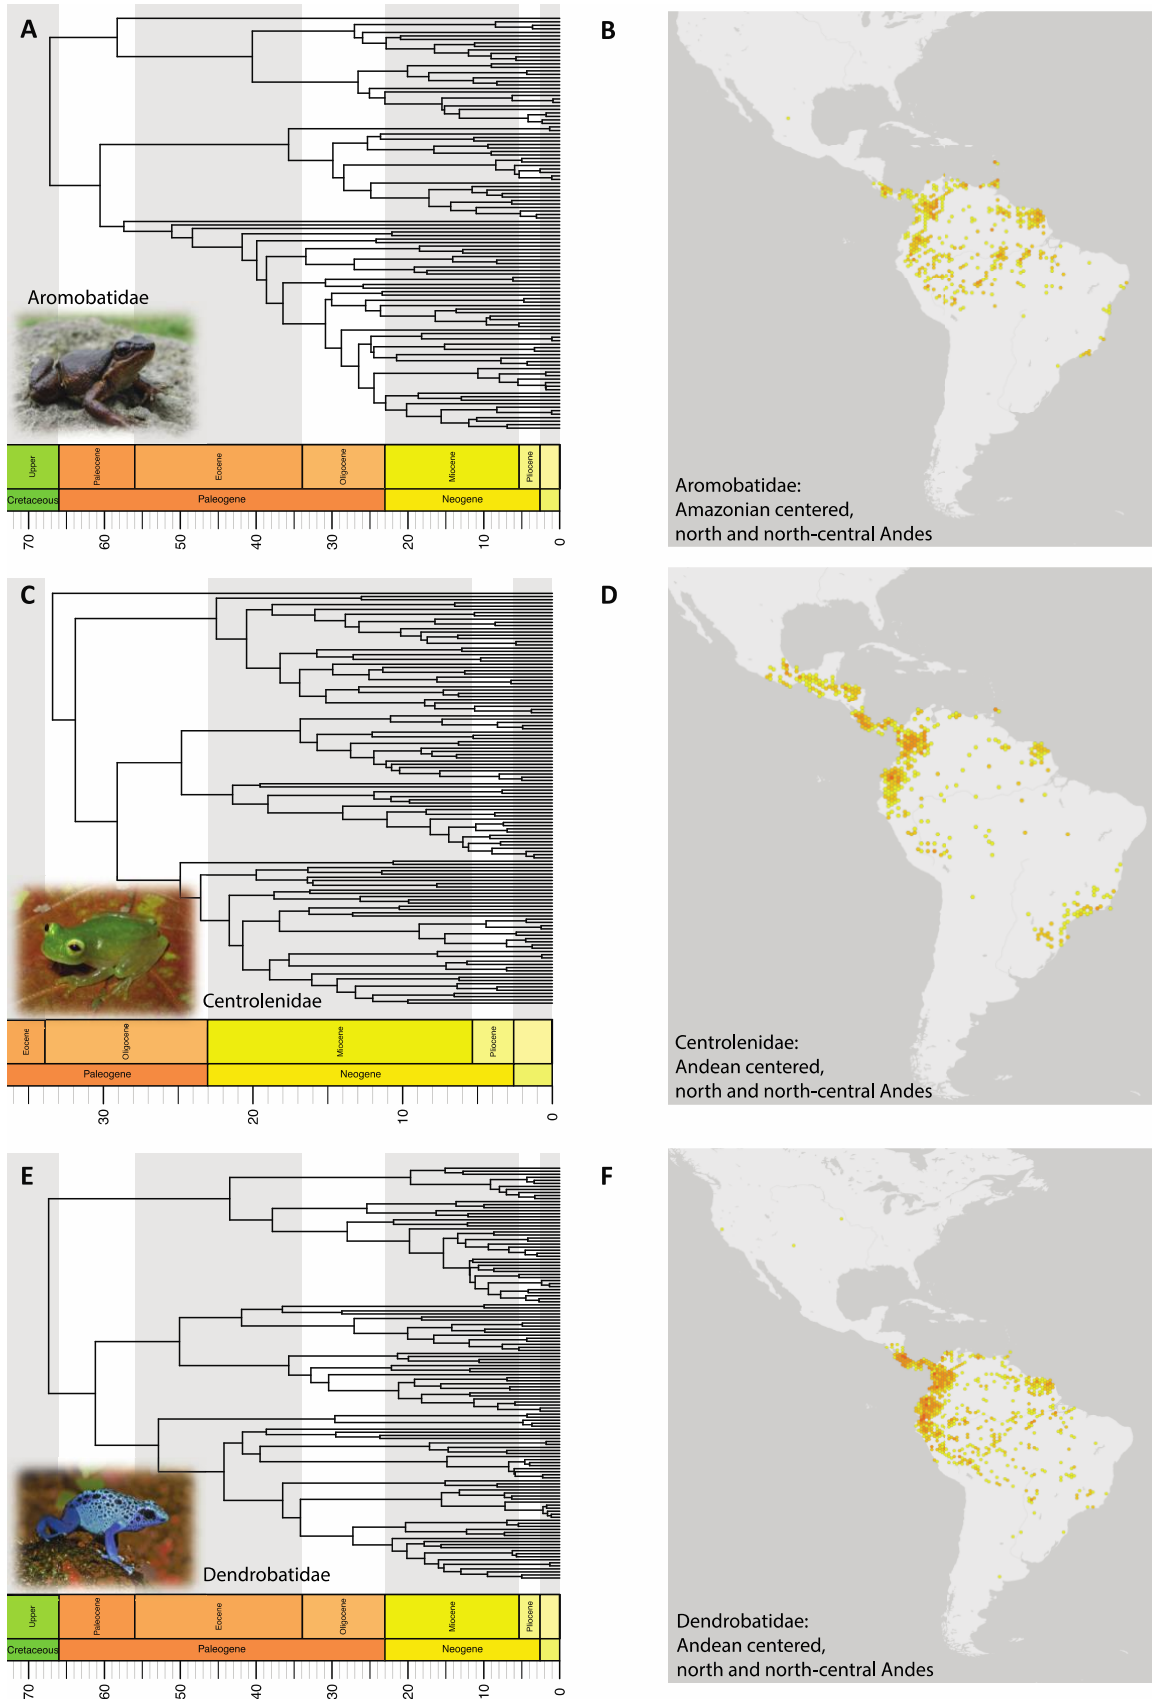

1223

1224

1225 **Supplementary Figure 1.** Distribution ranges of Aromobatidae, Centrolenidae and Dendrobatidae.

1226 From GBIF (the Global Biodiversity Information Facility, [www.gbif.com](http://www.gbif.com)).

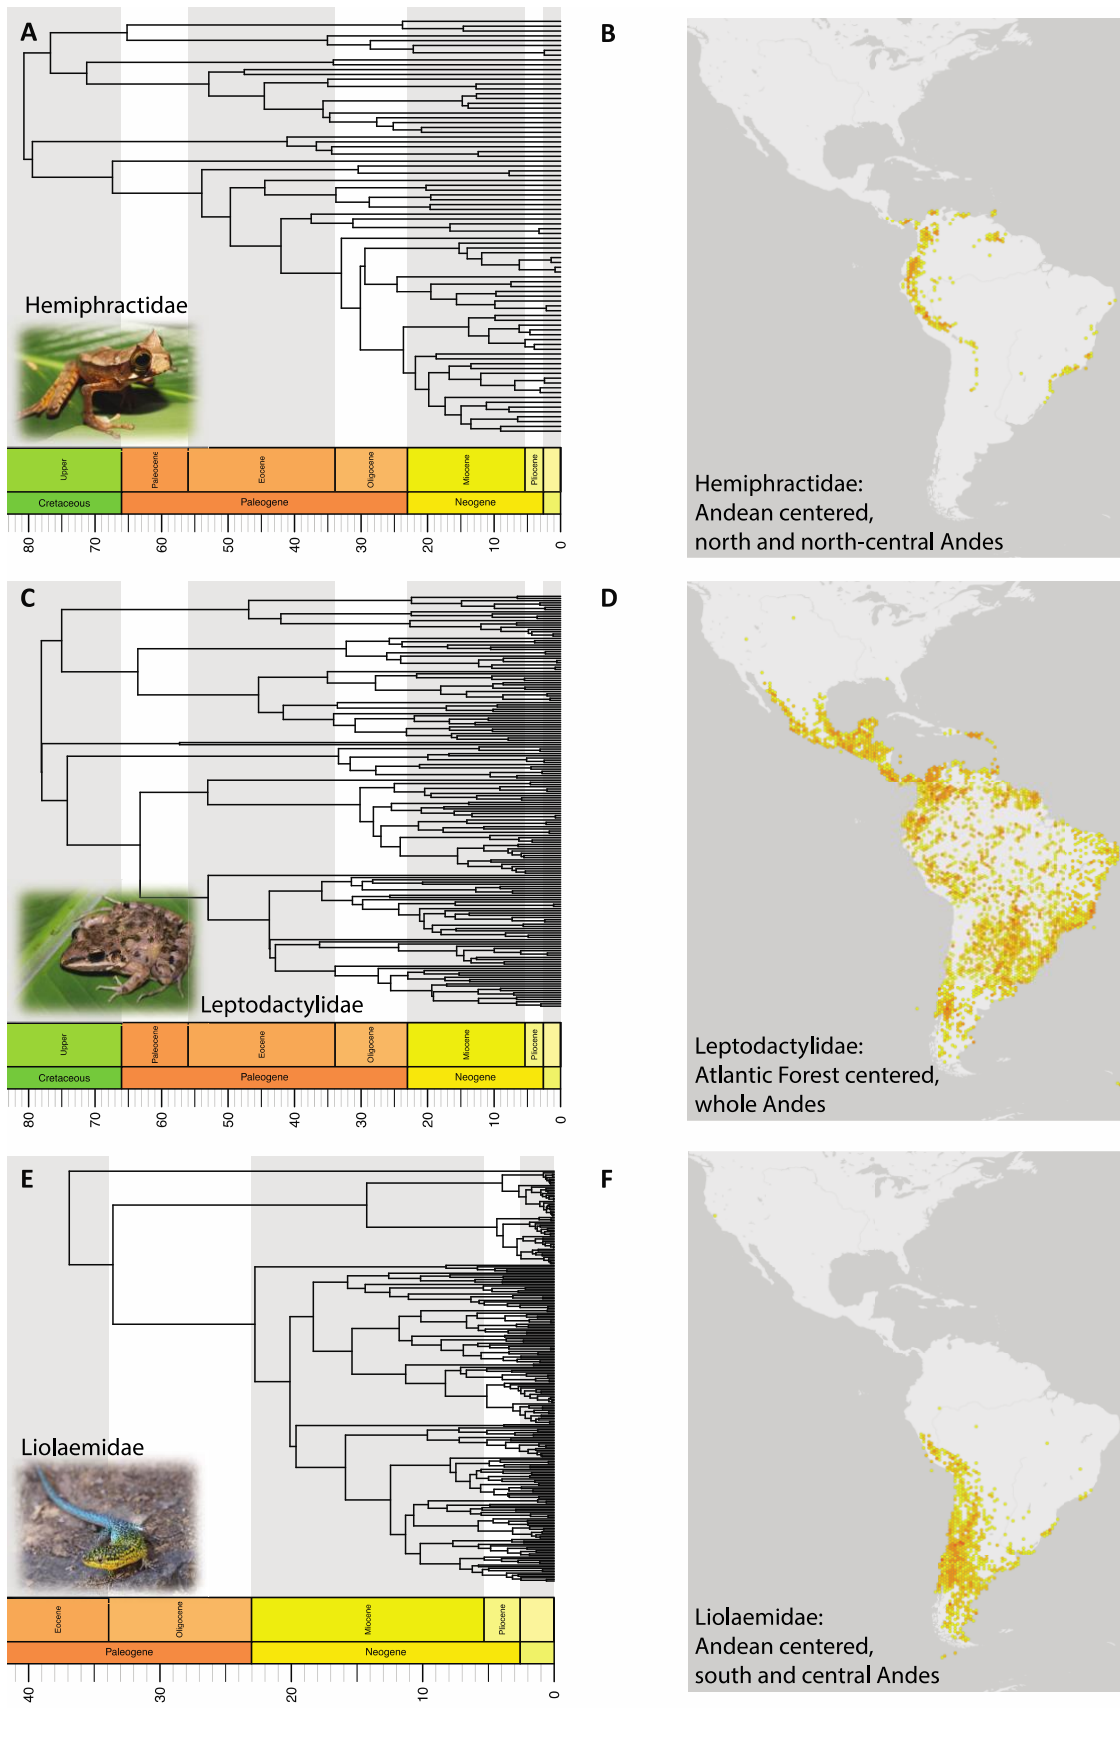

1227  
1228

1229 **Supplementary Figure 2.** Distribution ranges of Hemiphractidae, Leptodactylidae, Liolaemidae. From  
1230 GBIF (the Global Biodiversity Information Facility, [www.gbif.com](http://www.gbif.com)).
